# Supplementary material for: Transition-metal-free oxidative reaction of hydrazines and potassium metabisulfite for preparation of sulfonohydrazides
Source: Royal Society of Chemistry journal article supplement (doi:10.1039/c7qo00168a), 2017-01-01
Supplement: c7qo00168a1.pdf [file c7qo00168a1.pdf]

## *Supporting Information*

### **Transition-metal-free oxidative reaction of hydrazines and potassium metabisulfite for preparation of sulfonohydrazide**

Yang Wang, Bingnan Du, Wanxing Sha, Haibo Mei, Jianlin Han\* and Yi Pan

|                                                                        |            |
|------------------------------------------------------------------------|------------|
| <b>1. General information</b> .....                                    | <b>S2</b>  |
| <b>2. Typical procedure for the metal-free coupling reaction</b> ..... | <b>S2</b>  |
| <b>3. Characterization data for 3 and 4</b> .....                      | <b>S2</b>  |
| <b>4. NMR spectra for compounds 3 and 4</b> .....                      | <b>S11</b> |
| <b>5. MS spectra for compounds 5 and 6</b> .....                       | <b>S35</b> |

## 1. General information

Except the special statement, all chemicals were purchased without further purification before use (Hydrazines were obtained by using NaOH (1 M) as base to neutralize the corresponding hydrazine hydrochlorides in water and extracted with ethyl acetate.). Solvents were dried by the standard method in solvent encliridion or treated with molecular sieves. General operation were conducted in oven-dried schlenk under dry-air balloom. Melting points were recorded on a melting points apparatus and were uncorrected. Thin layer chromatography (TLC) was performed on silica gel GF-254 plates and visualized by fluorescence quenching under UV light. For column chromatography, 200-300 mesh of silica gel was used and performed by standard technique.

<sup>1</sup>H-NMR and <sup>13</sup>C-NMR spectra were recorded on a Bruker Avance 400 spectrometer in CDCl<sub>3</sub> [using (CH<sub>3</sub>)<sub>4</sub>Si (for <sup>1</sup>H, δ = 0.00; for <sup>13</sup>C, δ = 77.00) as internal standard] at room temperature. All coupling constants were given in Hertz (Hz). Infrared (IR) spectra was performed on Bruker Vector 22 in KBr pellets. High resolution mass spectra (HR MS) were obtained on a LTQ-Orbitrap XL with the ESI technique.

## 2. Typical procedure metal-free coupling reaction

Hydrazines **1** (0.25 mmol), K<sub>2</sub>S<sub>2</sub>O<sub>5</sub> (0.5 mmol), diamine (0.3 mmol), were added to a 25 mL schlenk tube under dry air balloom, followed by addition of CH<sub>3</sub>CN (2.5 ml). The mixture was stirred at 40 °C for 12 h, then filtered and the solid was washed with ethyl acetate. The organic solution was dried over Na<sub>2</sub>SO<sub>4</sub> and concentrated under vacuo. Then, crude product was purified by flash chromatography to afford the desired product **3**.

## 3. Characterization data for **3**, **4**

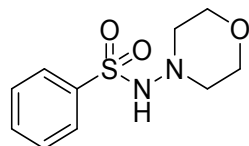

### N-morpholinobenzenesulfonamide<sup>1</sup> (**3aa**)

White solid, m.p. 121–122°C. <sup>1</sup>H NMR (400 MHz, Chloroform-d) δ 8.01 – 7.96 (m, 2H), 7.64 – 7.57 (m, 1H), 7.57 – 7.50 (m, 2H), 5.93 (s, 1H), 3.60 (t, 4H), 2.62 (t, 4H); <sup>13</sup>C NMR (101 MHz,

Chloroform-d)  $\delta$  138.62 , 133.16 , 128.85 , 128.12 , 66.62 , 56.63; IR  $\nu_{\max}$  (neat)/cm<sup>-1</sup> 3134, 2858, 1451, 1366, 1335, 1264, 1156, 1102, 856, 724.

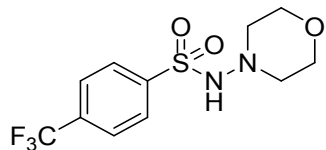

#### **N-morpholino-4-(trifluoromethyl)benzenesulfonamide<sup>2</sup> (3ba)**

White solid, m.p. 163–164°C. <sup>1</sup>H NMR (400 MHz, Chloroform-d)  $\delta$  8.12 (d, J = 8.2 Hz, 2H), 7.80 (d, J = 8.2 Hz, 2H), 5.81 (s, 1H), 3.63 (t, 4H), 2.67 (t, 4H); <sup>13</sup>C NMR (101 MHz, Chloroform-d)  $\delta$  142.30 , 134.84 (q, J = 33.1 Hz), 128.65 , 126.00 (q, J = 3.7 Hz), 123.19 (q, J = 273.1 Hz), 66.58 , 56.80; IR  $\nu_{\max}$  (neat)/cm<sup>-1</sup> 3196, 2860, 1403, 1322, 1165, 1107, 1061, 1012, 869, 840, 712.

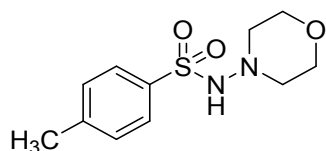

#### **4-methyl-N-morpholinobenzenesulfonamide<sup>1</sup> (3ca)**

White solid, m.p. 102–103°C. <sup>1</sup>H NMR (400 MHz, Chloroform-d)  $\delta$  7.92 – 7.65 (m, 2H), 7.24 (d, J = 8.1 Hz, 2H), 5.55 (s, 1H), 3.53 (t, 4H), 2.55 (t, 4H), 2.37 (s, 3H); <sup>13</sup>C NMR (101 MHz, Chloroform-d)  $\delta$  144.04 , 135.66 , 129.49 , 128.17 , 66.66 , 56.72 , 21.64; IR  $\nu_{\max}$  (neat)/cm<sup>-1</sup> 3217, 2922, 2847, 1594, 1497, 1325, 1259, 1181, 1097, 1022, 795.

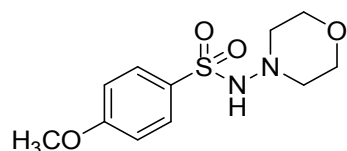

#### **4-methoxy-N-morpholinobenzenesulfonamide<sup>1</sup> (3da)**

Yellow solid, m.p. 167–168°C. <sup>1</sup>H NMR (400 MHz, Chloroform-d)  $\delta$  8.00 – 7.82 (m, 2H), 7.09 – 6.89 (m, 2H), 5.67 (s, 1H), 3.88 (s, 3H), 3.61 (t, 4H), 2.62 (t, 4H); <sup>13</sup>C NMR (101 MHz, Chloroform-d)  $\delta$  163.27 , 130.32 , 130.08 , 114.01 , 66.68 , 56.69 , 55.63; IR  $\nu_{\max}$  (neat)/cm<sup>-1</sup> 3199, 2962, 2839, 1593, 1579, 1495, 1456, 1335, 1253, 1104, 864, 803, 719.

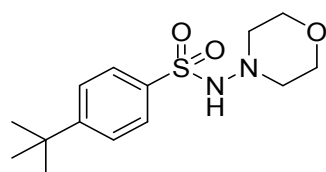

#### **4-(tert-butyl)-N-morpholinobenzenesulfonamide<sup>1</sup> (3ea)**

White solid, m.p. 173 – 174°C. <sup>1</sup>H NMR (400 MHz, Chloroform-*d*) δ 7.98 – 7.79 (m, 2H), 7.62 – 7.46 (m, 2H), 5.74 (s, 1H), 3.61 (t, 4H), 2.64 (t, 4H), 1.35 (s, 9H); <sup>13</sup>C NMR (101 MHz, Chloroform-*d*) δ 157.04 , 135.64 , 127.96 , 125.81 , 66.62 , 56.75 , 35.21 , 31.10; IR ν<sub>max</sub> (neat)/cm<sup>-1</sup> 13156, 2871, 2161, 1335, 1157, 1106, 863, 665.

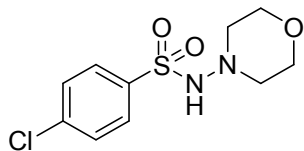

**4-chloro-N-morpholinobenzenesulfonamide<sup>1</sup> (3fa)**

White solid, m.p.173–174°C.<sup>1</sup>H NMR (400 MHz, Chloroform-*d*) δ 8.00 – 7.84 (m, 2H), 7.63 – 7.42 (m, 2H), 5.73 (s, 1H), 3.62 (t, 4H), 2.65 (t, 4H); <sup>13</sup>C NMR (101 MHz, Chloroform-*d*) δ 139.75 , 137.13 , 129.59 , 129.18 , 66.61 , 56.73; IR ν<sub>max</sub> (neat)/cm<sup>-1</sup>13180, 2922, 2855, 1647, 1574, 1468, 1331, 1158, 1083, 866, 755.

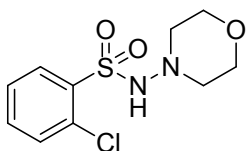

**2-chloro-N-morpholinobenzenesulfonamide<sup>1</sup> (3ga)**

White solid, m.p. 163–164°C. <sup>1</sup>H NMR (400 MHz, Chloroform-*d*) δ 8.24 – 8.17 (m, 1H), 7.59 – 7.50 (m, 2H), 7.49 – 7.43 (m, 1H), 6.21 (s, 1H), 3.57 (t, 4H), 2.70 (t, 4H); <sup>13</sup>C NMR (101 MHz, Chloroform-*d*) δ 136.28 , 134.24 , 132.99 , 131.66 , 131.52 , 127.17 , 66.44 , 56.58; IR ν<sub>max</sub> (neat)/cm<sup>-1</sup>3145, 2157, 2037, 1570, 1435, 1338, 1174, 1099, 1040, 858, 774, 665.

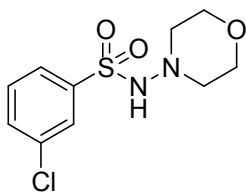

**3-chloro-N-morpholinobenzenesulfonamide<sup>1</sup> (3ha)**

Light yellow oil.<sup>1</sup>H NMR (400 MHz, Chloroform-*d*) δ 7.98 (t, J = 2.0 Hz, 1H), 7.90 – 7.84 (m, 1H), 7.62 – 7.56 (m, 1H), 7.48 (t, J = 7.9 Hz, 1H), 5.96 (d, J = 8.4 Hz, 1H), 3.63 (t, 4H), 2.66 (t, 5H); <sup>13</sup>C NMR (101 MHz, Chloroform-*d*) δ 140.34 , 135.04 , 133.28 , 130.16 , 128.18 , 126.18 , 66.59 , 56.68; IR ν<sub>max</sub> (neat)/cm<sup>-1</sup>2855, 1458, 1362, 1264, 1160, 1107, 864, 789, 669.

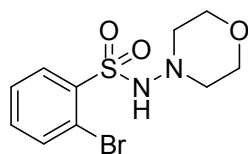

**2-bromo-N-morpholinobenzenesulfonamide<sup>3</sup> (3ia)**

Yellow solid, m.p. 145–146°C. <sup>1</sup>H NMR (400 MHz, Chloroform-*d*) δ 8.25 (dd, *J* = 7.7, 1.9 Hz, 1H), 7.74 (dd, *J* = 7.7, 1.4 Hz, 1H), 7.55 – 7.42 (m, 2H), 6.22 (s, 1H), 3.57 (t, 4H), 2.71 (t, 4H); <sup>13</sup>C NMR (101 MHz, Chloroform-*d*) δ 137.90 , 135.00 , 134.22 , 133.31 , 127.77 , 120.04 , 66.45 , 56.55; IR ν<sub>max</sub> (neat)/cm<sup>-1</sup> 3160, 2920, 2847, 2155, 1430, 1338, 1170, 1099, 860, 772, 733.

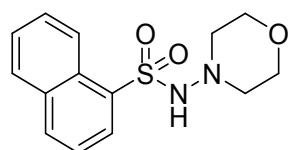

**N-morpholinonaphthalene-1-sulfonamide<sup>4</sup> (3ja)**

Brown solid, m.p. 148–149°C. <sup>1</sup>H NMR (400 MHz, Chloroform-*d*) δ 8.80 (d, *J* = 8.7 Hz, 1H), 8.39 (dd, *J* = 7.4, 1.1 Hz, 1H), 8.09 (d, *J* = 8.2 Hz, 1H), 7.93 (d, *J* = 8.1 Hz, 1H), 7.72 – 7.64 (m, 1H), 7.63 – 7.53 (m, 2H), 5.97 (s, 1H), 3.47 (t, 4H), 2.53 (t, 4H); <sup>13</sup>C NMR (101 MHz, Chloroform-*d*) δ 134.80 , 134.07 , 133.57 , 131.40 , 128.91 , 128.55 , 128.18 , 126.85 , 125.14 , 124.20 , 66.50 , 56.75; IR ν<sub>max</sub> (neat)/cm<sup>-1</sup> 3189, 2848, 1507, 1280, 1261, 1161, 1108, 864, 764, 676.

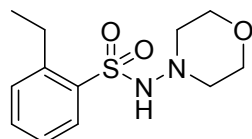

**2-ethyl-N-morpholinobenzenesulfonamide (3ka)**

Light yellow oil. <sup>1</sup>H NMR (400 MHz, Chloroform-*d*) δ 8.11 – 7.85 (m, 1H), 7.46 (td, *J* = 7.5, 1.4 Hz, 1H), 7.35 – 7.19 (m, 2H), 5.62 (s, 1H), 3.65 – 3.40 (m, 4H), 3.04 (q, *J* = 7.5 Hz, 2H), 2.73 – 2.44 (m, 4H), 1.25 (t, *J* = 7.5 Hz, 4H). <sup>13</sup>C NMR (101 MHz, Chloroform-*d*) δ 144.22 , 136.13, 133.39 , 131.17 , 130.55, 125.91, 66.61, 56.76, 26.25, 15.53. HRMS (TOF MS ESI): calcd for C<sub>12</sub>H<sub>19</sub>N<sub>2</sub>O<sub>3</sub>S<sup>+</sup> [M+H]<sup>+</sup> 271.1111, found 271.1110. IR ν<sub>max</sub> (neat)/cm<sup>-1</sup> 3184, 2966, 2864, 1363, 1262, 1108, 864, 763, 693, 596.

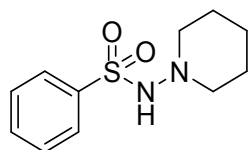

**N-(piperidin-1-yl)benzenesulfonamide<sup>1</sup> (3ab)**

Light yellow solid, m.p. 93–94°C. <sup>1</sup>H NMR (400 MHz, Chloroform-*d*) δ 8.05 – 7.90 (m, 2H), 7.63 – 7.56 (m, 1H), 7.55 – 7.48 (m, 2H), 5.48 (s, 1H), 2.53 (t, *J* = 5.4 Hz, 4H), 1.56 – 1.43 (m, 4H), 1.35 – 1.21 (m, 2H); <sup>13</sup>C NMR (101 MHz, Chloroform-*d*) δ 138.79 , 132.89 , 128.68 , 128.12 , 57.77 , 25.62 , 23.02; IR ν<sub>max</sub> (neat)/cm<sup>-1</sup> 3206, 2933, 2850, 2159, 1448, 1326, 1158, 863, 761, 721.

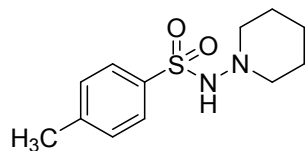

#### 4-methyl-N-(piperidin-1-yl)benzenesulfonamide<sup>2</sup> (3ac)

Brown solid, m.p. 124–125°C. <sup>1</sup>H NMR (400 MHz, Chloroform-*d*) δ 7.99 – 7.73 (m, 2H), 7.30 (d, *J* = 8.0 Hz, 2H), 5.42 (s, 1H), 2.53 (t, *J* = 5.4 Hz, 4H), 2.44 (s, 3H), 1.60 – 1.41 (m, 4H), 1.35 – 1.27 (m, 2H); <sup>13</sup>C NMR (101 MHz, Chloroform-*d*) δ 143.66 , 135.86 , 129.32 , 128.14 , 57.78 , 25.64 , 23.05 , 21.63; IR ν<sub>max</sub> (neat)/cm<sup>-1</sup> 3199, 2921, 2851, 1597, 1468, 1455, 1329, 1161, 1036, 864, 794.

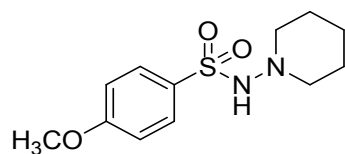

#### 4-methoxy-N-(piperidin-1-yl)benzenesulfonamide<sup>2</sup> (3ad)

White solid, m.p. 179–180°C. <sup>1</sup>H NMR (400 MHz, Chloroform-*d*) δ 7.92 – 7.87 (m, 2H), 7.02 – 6.93 (m, 2H), 5.35 (s, 1H), 3.88 (s, 3H), 2.53 (t, *J* = 5.4 Hz, 4H), 1.57 – 1.45 (m, 4H), 1.35 – 1.27 (m, 2H); <sup>13</sup>C NMR (101 MHz, Chloroform-*d*) δ 163.08 , 130.39 , 130.27 , 113.84 , 57.78 , 55.59 , 25.66 , 23.06; IR ν<sub>max</sub> (neat)/cm<sup>-1</sup> 3197, 2960, 1595, 1457, 1333, 1266, 1161, 866, 812, 756.

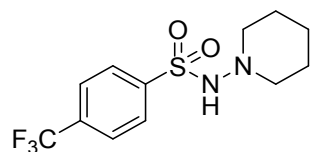

#### N-(piperidin-1-yl)-4-(trifluoromethyl)benzenesulfonamide (3ae)

Light yellow solid, m.p. 151–152°C. <sup>1</sup>H NMR (400 MHz, Chloroform-*d*) δ 8.11 (d, *J* = 8.2 Hz, 2H), 7.79 (d, *J* = 8.3 Hz, 2H), 5.55 (s, 1H), 2.56 (t, 4H), 1.59 – 1.45 (m, 4H), 1.39 – 1.27 (m, 2H); <sup>13</sup>C NMR (101 MHz, Chloroform-*d*) δ 142.43 , 134.56 (q, *J* = 33.0 Hz), 128.63 , 125.81 (q, *J* = 3.7 Hz), 123.28 (q, *J* = 272.9 Hz); HRMS (TOF MS ESI): calcd for C<sub>12</sub>H<sub>16</sub>F<sub>3</sub>N<sub>2</sub>O<sub>2</sub>S<sup>+</sup> [M+H]<sup>+</sup> 309.0879, found 309.0876. IR ν<sub>max</sub> (neat)/cm<sup>-1</sup> 3199, 2161, 1320, 1165, 1061, 795, 635.

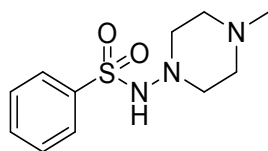

**N-(4-methylpiperazin-1-yl)benzenesulfonamide (3af)**

Light yellow solid, m.p. 153–154°C. <sup>1</sup>H NMR (400 MHz, Chloroform-*d*) δ 8.00 – 7.94 (m, 2H), 7.64 – 7.57 (m, 1H), 7.56 – 7.49 (m, 2H), 5.80 (s, 1H), 2.65 (t, *J* = 4.7 Hz, 4H), 2.37 (s, 4H), 2.22 (s, 3H); <sup>13</sup>C NMR (101 MHz, Chloroform-*d*) δ 138.71 , 133.01 , 128.78 , 128.12 , 55.93 , 54.53 , 45.55; HRMS (TOF MS ESI): calcd for C<sub>11</sub>H<sub>18</sub>N<sub>3</sub>O<sub>2</sub>S<sup>+</sup> [M+H]<sup>+</sup>256.1114, found 256.1111. IR ν<sub>max</sub> (neat)/cm<sup>-1</sup> 3676, 2955, 2823, 2160, 1447, 1315, 1277, 1153, 1078, 1012, 829, 757.

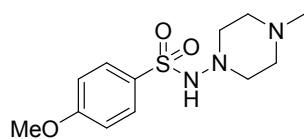

**4-methoxy-N-(4-methylpiperazin-1-yl)benzenesulfonamide<sup>4</sup> (3ag)**

Yellow oil. <sup>1</sup>H NMR (400 MHz, Chloroform-*d*) δ 7.95 – 7.81 (m, 2H), 7.06 – 6.90 (m, 2H), 5.48 (s, 1H), 3.88 (s, 3H), 2.68 (t, *J* = 4.9 Hz, 4H), 2.42 (s, 4H), 2.26 (s, 3H). <sup>13</sup>C NMR (101 MHz, Chloroform-*d*) δ 163.20, 130.31, 130.19, 55.79, 55.62, 54.52, 45.46. IR ν<sub>max</sub> (neat)/cm<sup>-1</sup> 3194, 2962, 1594, 1336, 1255, 1155, 851, 686, 558.

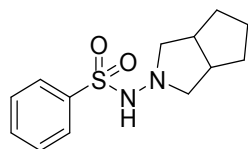

**N-(hexahydrocyclopenta[c]pyrrol-2(1H)-yl)benzenesulfonamide (3ah)**

Light yellow oil. <sup>1</sup>H NMR (400 MHz, Chloroform-*d*) δ 8.06 – 7.83 (m, 2H), 7.64 – 7.57 (m, 1H), 7.56 – 7.46 (m, 2H), 5.29 (s, 1H), 2.77 – 2.56 (m, 2H), 2.50 – 2.26 (m, 4H), 1.82 (s, 2H), 1.61 (td, *J* = 11.3, 9.7, 6.7 Hz, 4H). <sup>13</sup>C NMR (101 MHz, Chloroform-*d*) δ 138.68, 132.92, 128.76, 128.18, 63.18 , 40.06, 33.17, 26.19. HRMS (TOF MS ESI): calcd for C<sub>13</sub>H<sub>19</sub>N<sub>2</sub>O<sub>2</sub>S<sup>+</sup> [M+H]<sup>+</sup>267.1162, found 267.1154. IR ν<sub>max</sub> (neat)/cm<sup>-1</sup> 2949, 2862, 1447, 1329, 1165, 1093, 876, 723, 567.

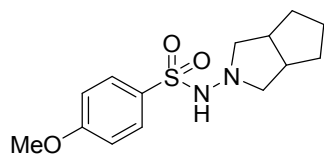

**N-(hexahydrocyclopenta[c]pyrrol-2(1H)-yl)-4-methoxybenzenesulfonamide (3ai)**

Light yellow oil. <sup>1</sup>H NMR (400 MHz, Chloroform-*d*) δ 7.92 – 7.66 (m, 2H), 6.98 – 6.74 (m, 2H), 5.02

(s, 1H), 3.81 (s, 3H), 2.76 – 2.49 (m, 2H), 2.44 – 2.20 (m, 4H), 1.75 – 1.46 (m, 6H). <sup>13</sup>C NMR (101 MHz, Chloroform-*d*) δ 163.14, 130.31, 130.26, 113.93, 63.28, 55.62, 40.10, 33.17, 26.19. HRMS (TOF MS ESI): calcd for C<sub>14</sub>H<sub>21</sub>N<sub>2</sub>O<sub>3</sub>S<sup>+</sup> [M+H]<sup>+</sup>297.1267, found 297.1273. IR ν<sub>max</sub> (neat)/cm<sup>-1</sup> 3410, 2946, 2861, 1652, 1580, 1259, 1159, 1027, 833, 569.

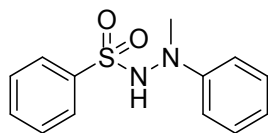

#### **N'-methyl-N'-phenylbenzenesulfonohydrazide<sup>1</sup> (3aj)**

Light yellow solid, m.p. 134–135°C. <sup>1</sup>H NMR (400 MHz, Chloroform-*d*) δ 8.03 – 7.91 (m, 2H), 7.70 – 7.55 (m, 1H), 7.54 – 7.41 (m, 2H), 7.22 – 7.11 (m, 2H), 6.94 – 6.76 (m, 3H), 6.37 (s, 1H), 2.95 (s, 3H); <sup>13</sup>C NMR (101 MHz, Chloroform-*d*) δ 149.62, 138.54, 133.38, 129.11, 128.92, 128.17, 120.98, 114.37, 42.74; IR ν<sub>max</sub> (neat)/cm<sup>-1</sup> 3196, 2918, 2850, 1599, 1501, 1446, 1339, 1285, 1156, 1087, 748.

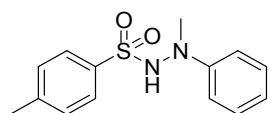

#### **N',4-dimethyl-N'-phenylbenzenesulfonohydrazide<sup>5</sup> (3ak)**

brown solid, m.p. 93–94°C. <sup>1</sup>H NMR (400 MHz, Chloroform-*d*) δ 7.83 (d, *J* = 8.2 Hz, 2H), 7.37 – 7.21 (m, 2H), 7.22 – 7.12 (m, 2H), 6.91 – 6.77 (m, 3H), 6.21 (s, 1H), 2.95 (s, 3H), 2.42 (s, 3H). <sup>13</sup>C NMR (101 MHz, Chloroform-*d*) δ 149.74, 144.32, 135.55, 129.73, 128.91, 128.22, 120.92, 114.38, 42.68, 21.65. IR ν<sub>max</sub> (neat)/cm<sup>-1</sup> 3196, 1599, 1501, 1335, 1157, 1090, 811, 749, 678, 531.

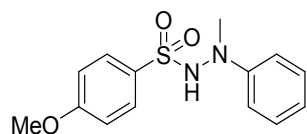

#### **4-methoxy-N'-methyl-N'-phenylbenzenesulfonohydrazide<sup>2</sup> (3al)**

Brown solid, m.p. 120–121°C. <sup>1</sup>H NMR (400 MHz, Chloroform-*d*) δ 8.00 – 7.69 (m, 2H), 7.22 – 7.06 (m, 2H), 7.02 – 6.91 (m, 2H), 6.92 – 6.76 (m, 3H), 6.20 (s, 1H), 3.85 (s, 3H), 2.96 (s, 3H). <sup>13</sup>C NMR (101 MHz, Chloroform-*d*) δ 163.48, 149.76, 130.40, 129.96, 128.93, 120.89, 114.36, 114.27, 55.65, 42.65. IR ν<sub>max</sub> (neat)/cm<sup>-1</sup> 3224, 1597, 1441, 1341, 1258, 1152, 1093, 1025, 754, 692, 534.



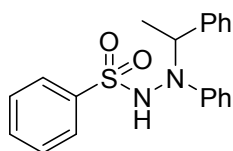

**N'-phenyl-N'-(1-phenylethyl)benzenesulfonohydrazide (3ap)**

Light yellow oil.  $^1\text{H}$  NMR (400 MHz, Chloroform-*d*)  $\delta$  7.87 – 7.62 (m, 2H), 7.51 – 7.36 (m, 1H), 7.33 – 7.15 (m, 5H), 7.07 – 6.92 (m, 4H), 6.84 (t,  $J = 7.3$  Hz, 1H), 6.64 (d,  $J = 7.5$  Hz, 2H), 6.02 (s, 1H), 4.69 (q,  $J = 7.0$  Hz, 1H), 1.78 – 1.37 (m, 3H).  $^{13}\text{C}$  NMR (101 MHz, Chloroform-*d*)  $\delta$  148.49 , 138.81 , 132.76 , 128.55 , 128.52 , 128.30 , 128.09 , 127.95 , 127.81 , 122.87 , 119.41 , 65.68 , 18.15 . HRMS (TOF MS ESI): calcd for  $\text{C}_{20}\text{H}_{21}\text{N}_2\text{O}_2\text{S}^+ [\text{M}+\text{H}]^+$  353.1318, found 353.1310. IR  $\nu_{\text{max}}$  (neat)/ $\text{cm}^{-1}$  3422, 2925, 1621, 1447, 1384, 1140, 752, 689, 596.

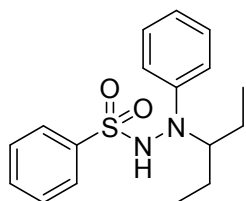

**N'-(pentan-3-yl)-N'-phenylbenzenesulfonohydrazide (3ar)**

Light yellow oil.  $^1\text{H}$  NMR (400 MHz, Chloroform-*d*)  $\delta$  7.96 – 7.64 (m, 2H), 7.48 – 7.35 (m, 1H), 7.32 – 7.24 (m, 2H), 7.09 – 6.97 (m, 2H), 6.80 – 6.68 (m, 3H), 6.49 (s, 1H), 3.15 (tt,  $J = 8.1, 5.5$  Hz, 1H), 1.56 (td,  $J = 14.7, 7.4$  Hz, 2H), 1.42 (dq,  $J = 14.5, 7.3, 5.5$  Hz, 2H), 1.11 – 0.55 (m, 6H).  $^{13}\text{C}$  NMR (101 MHz, Chloroform-*d*)  $\delta$  149.76 , 138.94 , 132.79 , 128.60 , 128.49 , 128.16 , 121.42 , 117.18 , 71.22 , 11.93. HRMS (TOF MS ESI): calcd for  $\text{C}_{17}\text{H}_{22}\text{N}_2\text{O}_2\text{SNa}^+ [\text{M}+\text{Na}]^+$  341.1294, found 341.1309. IR  $\nu_{\text{max}}$  (neat)/ $\text{cm}^{-1}$  3442, 2923, 2852, 2361, 1633, 1401, 1143, 752, 618.

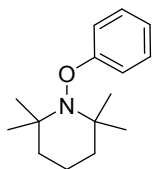

**2,2,6,6-tetramethyl-1-phenoxy-piperidine<sup>1</sup>(4)**

Colourless oil.  $^1\text{H}$  NMR (400 MHz,  $\text{CDCl}_3$ )  $\delta$  7.24 – 7.13 (m, 4H), 6.84 (tt,  $J = 6.8, 1.8$  Hz, 1H), 1.62 – 1.52 (m, 6H), 1.23 (s, 6H), 1.01 (s, 6H).  $^{13}\text{C}$  NMR (101 MHz,  $\text{CDCl}_3$ )  $\delta$  163.59, 128.65, 119.84, 113.89, 60.31, 39.79, 32.60, 20.45, 17.07.

1. Zheng, D.; An, Y.; Li, Z.; Wu, J. *Angew. Chem. Int. Ed.* **2014**, *53*, 2451.
2. Ye, S.; Wu, J. *Chem. Commun.* **2012**, *48*, 10037.
3. Li, W.; Beller, M.; Wu, X. F. *Chem. Commun.* **2014**, *50*, 9513.
4. Li, W.; Li, H.; Langer, P.; Beller, M.; Wu, X.-F. *Eur. J. Org. Chem.* **2014**, 3101.
5. Emmett, E. J.; Richards-Taylor, C. S.; Nguyen, B.; Garcia-Rubia, A.; Hayter, B. R.; Willis, M. *C. Org. Biomol. Chem.* **2012**, *10*, 4007.

#### 4. NMR spectra for compounds 3 and 4

$^1\text{H}$  and  $^{13}\text{C}$  NMR for 3aa

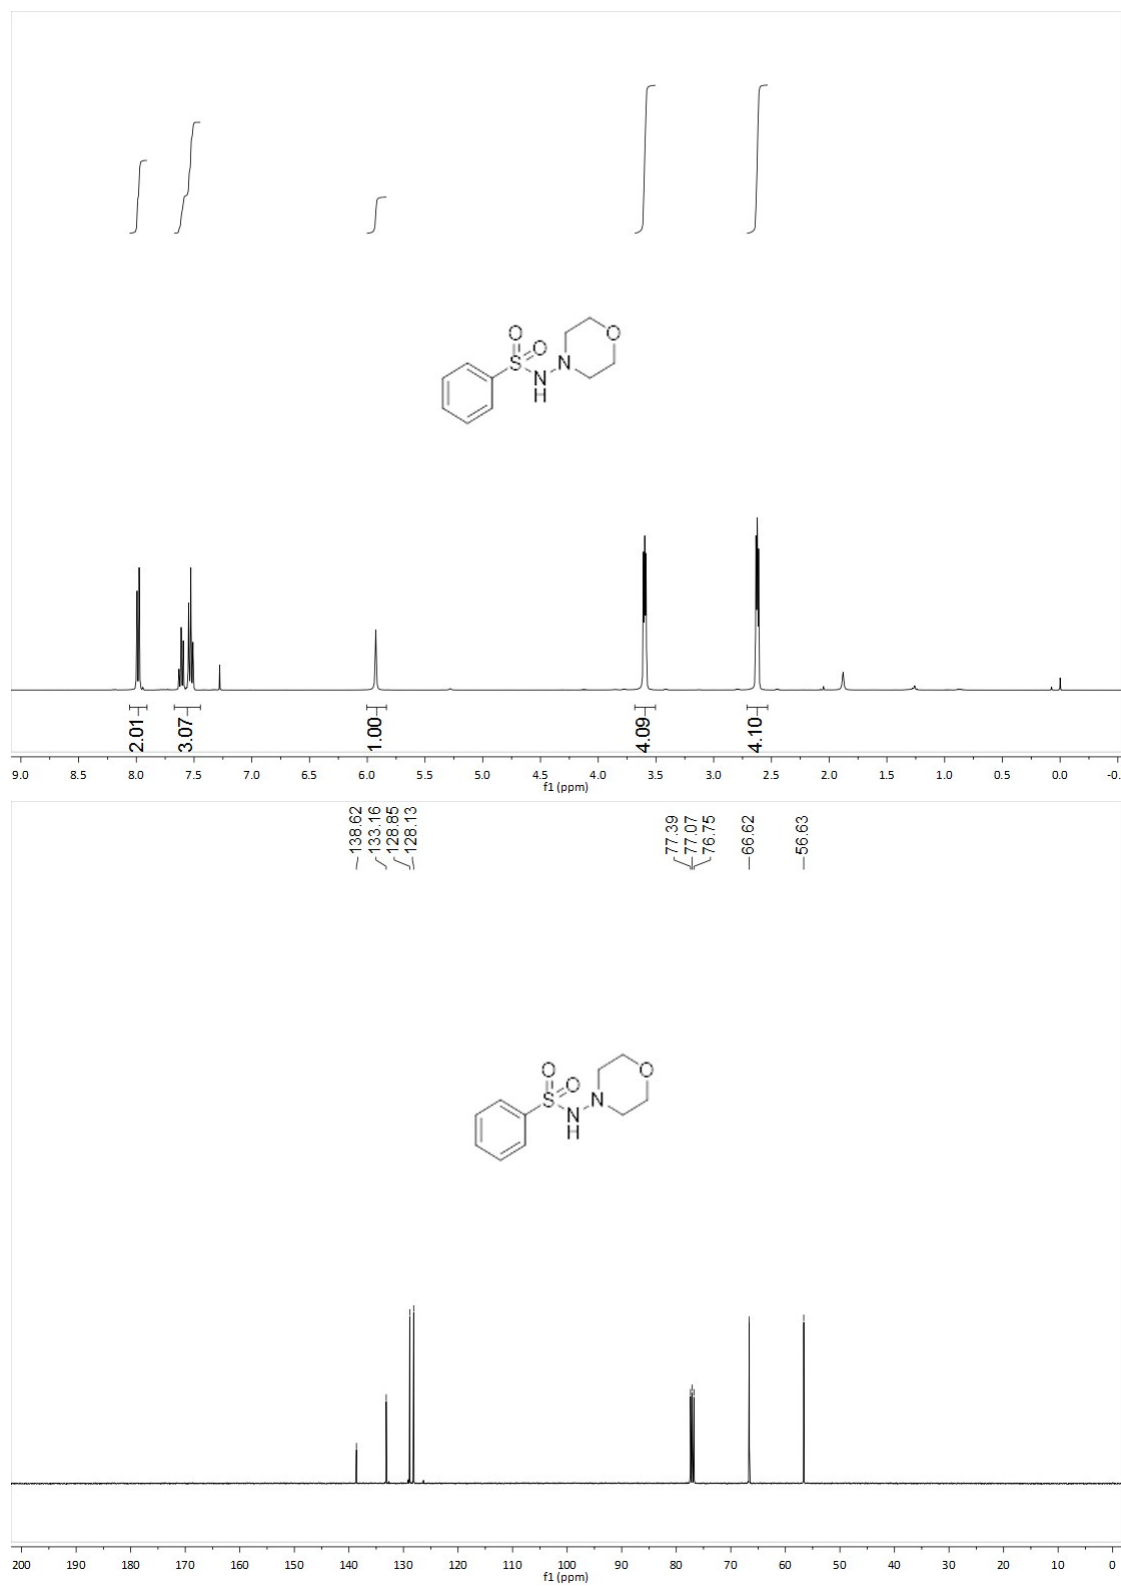

<sup>1</sup>H and <sup>13</sup>C NMR for **3ba**

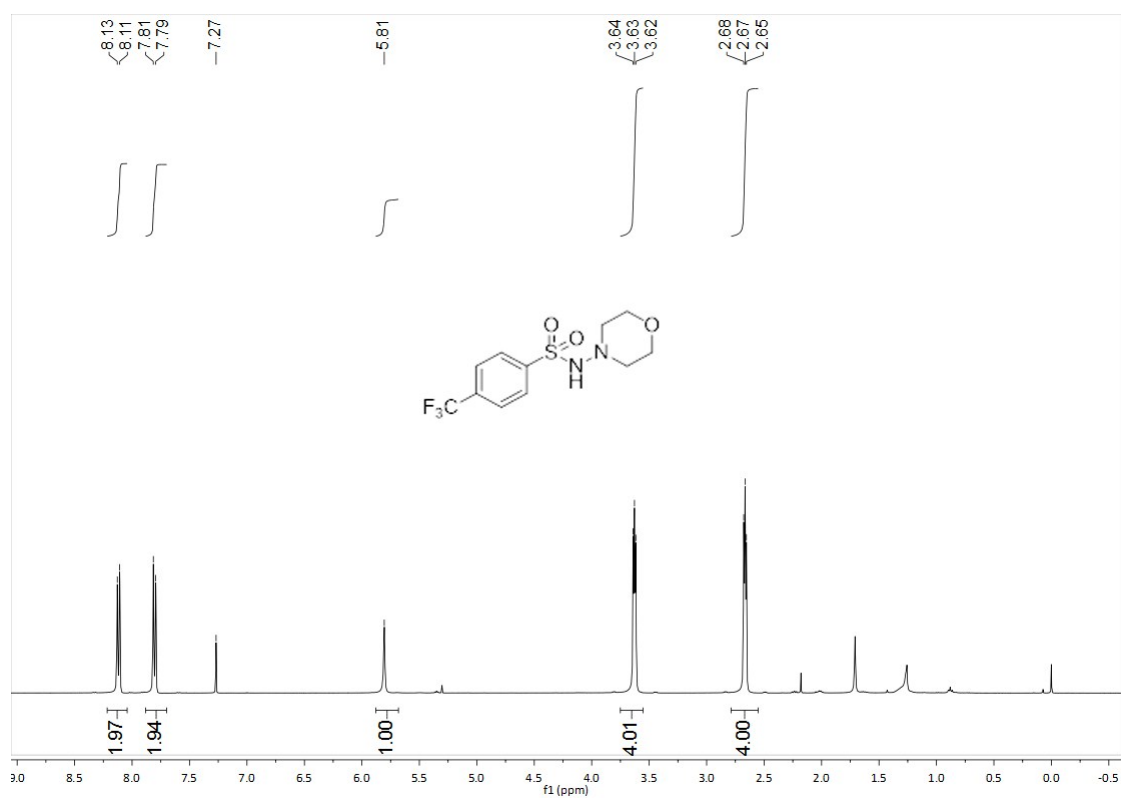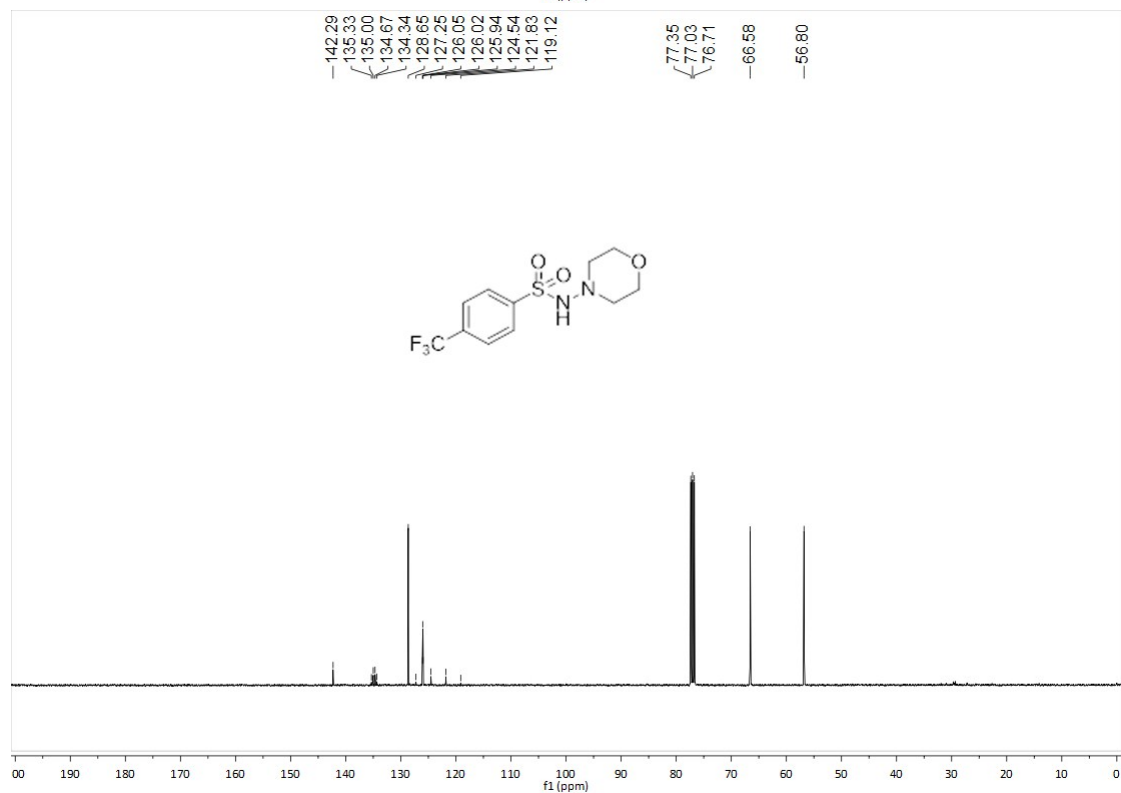

$^1\text{H}$  and  $^{13}\text{C}$  NMR for **3ca**

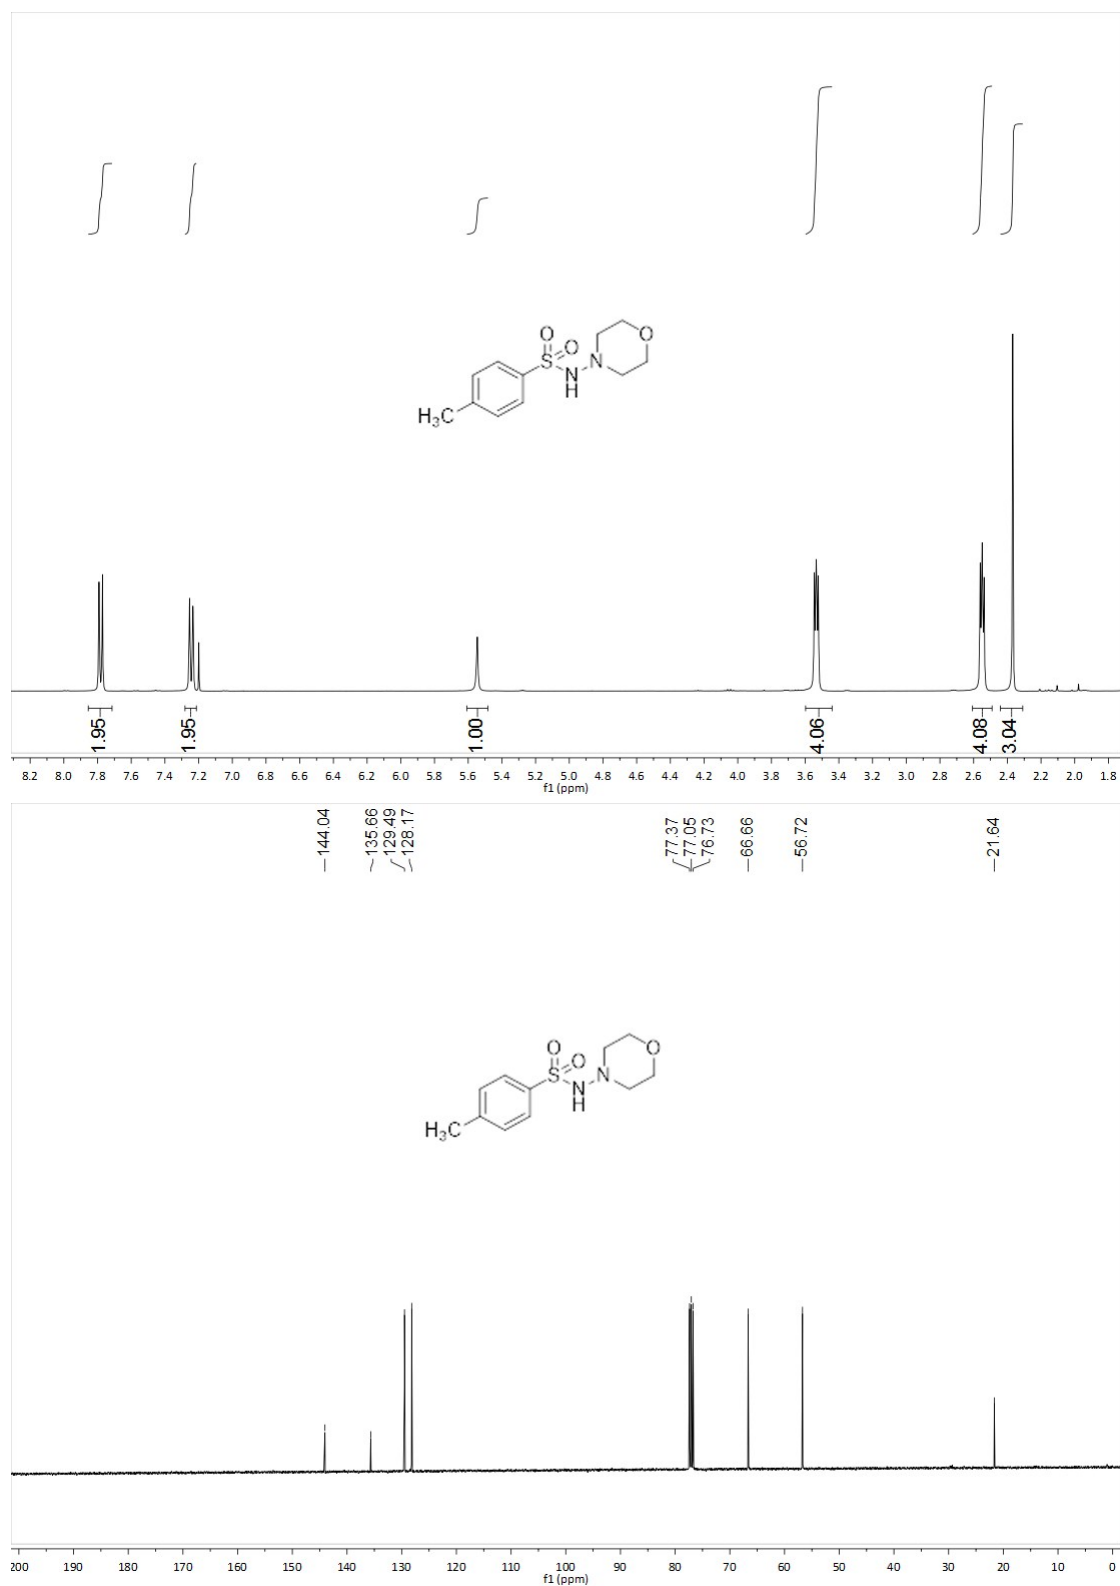

<sup>1</sup>H and <sup>13</sup>C NMR for **3da**

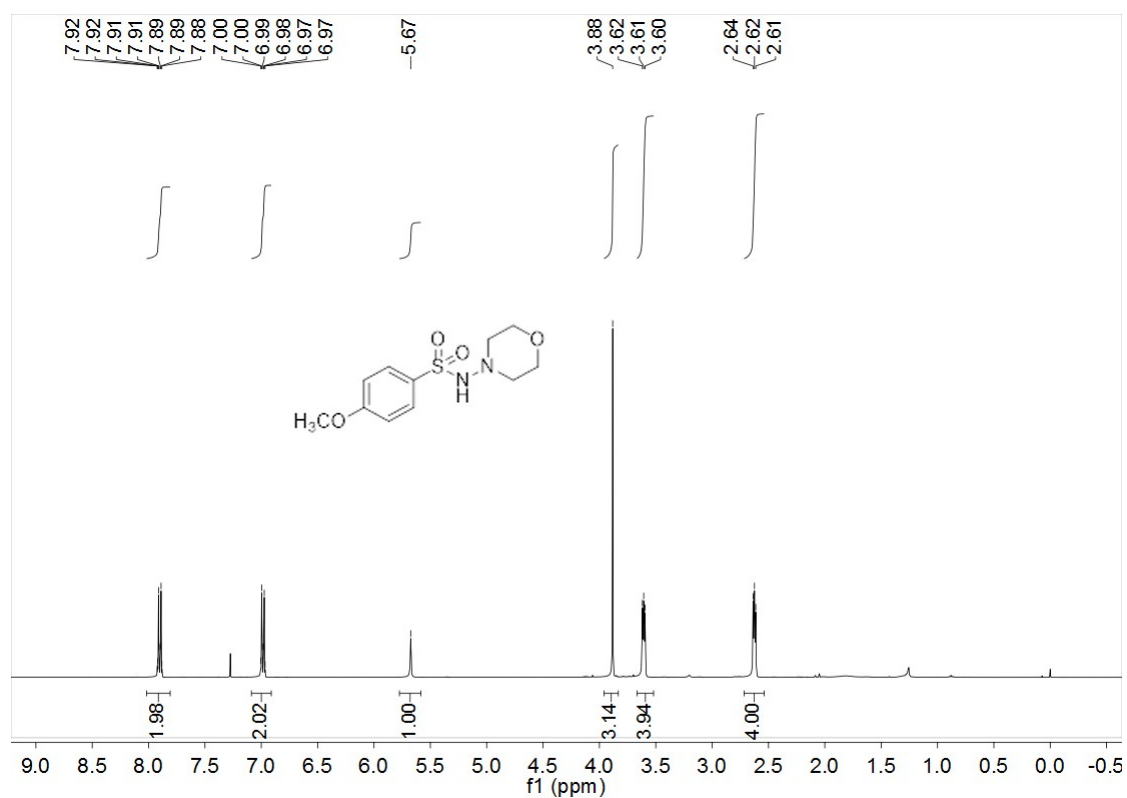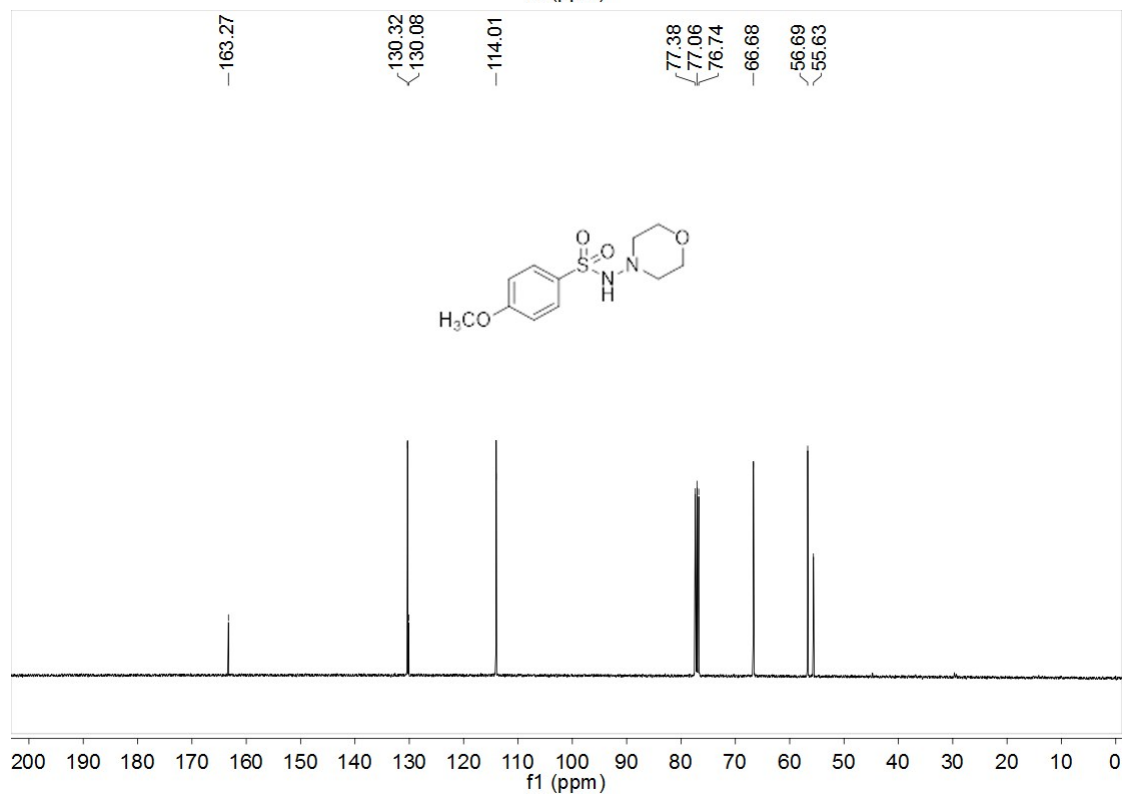

<sup>1</sup>H and <sup>13</sup>C NMR for **3ea**

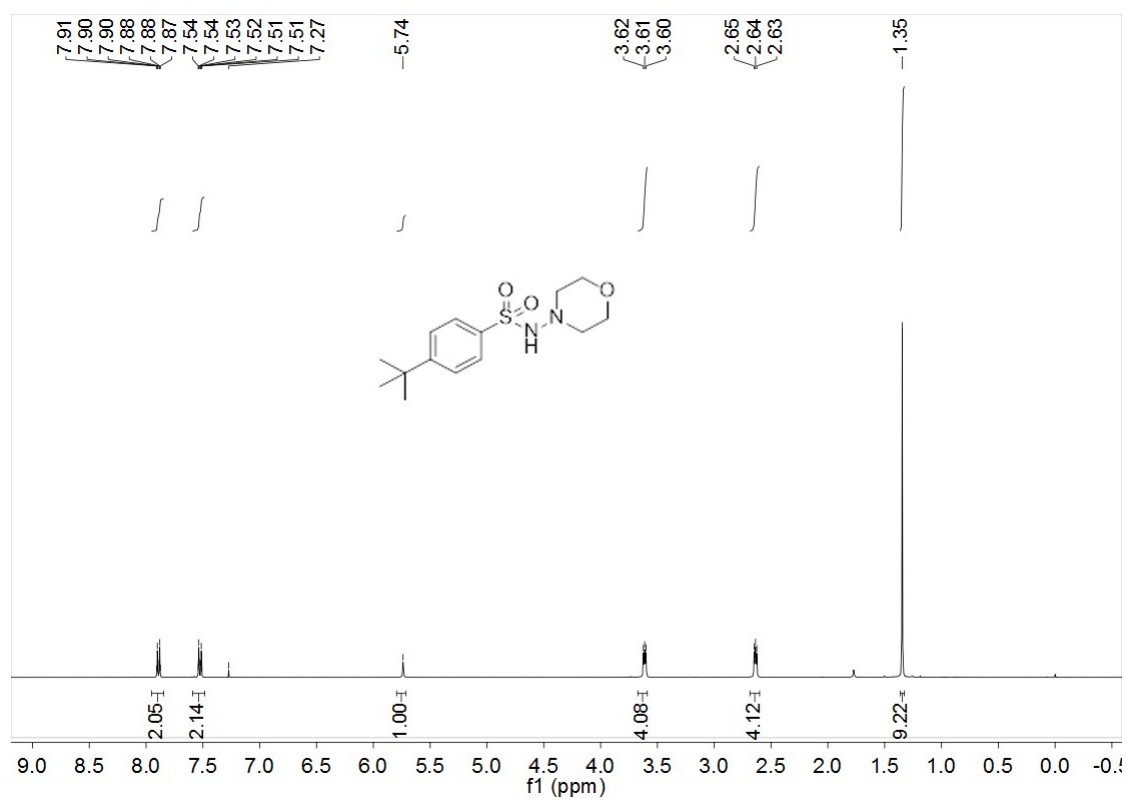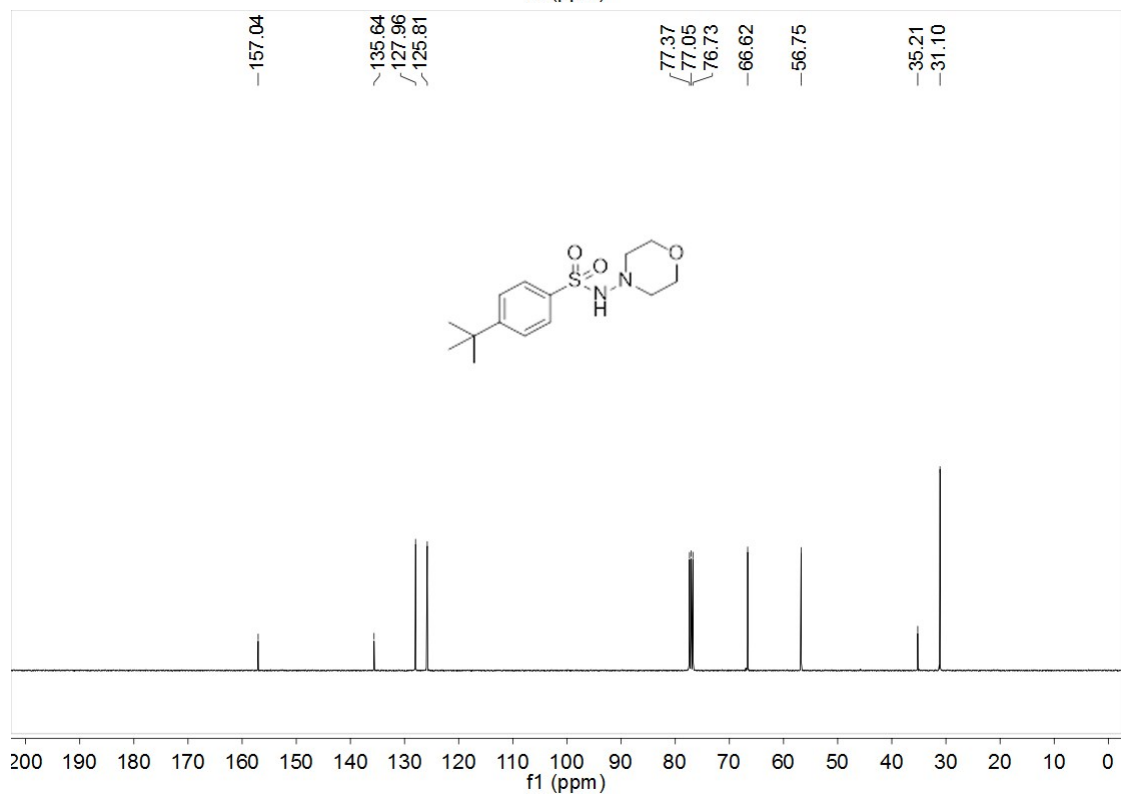

<sup>1</sup>H and <sup>13</sup>C NMR for **3fa**

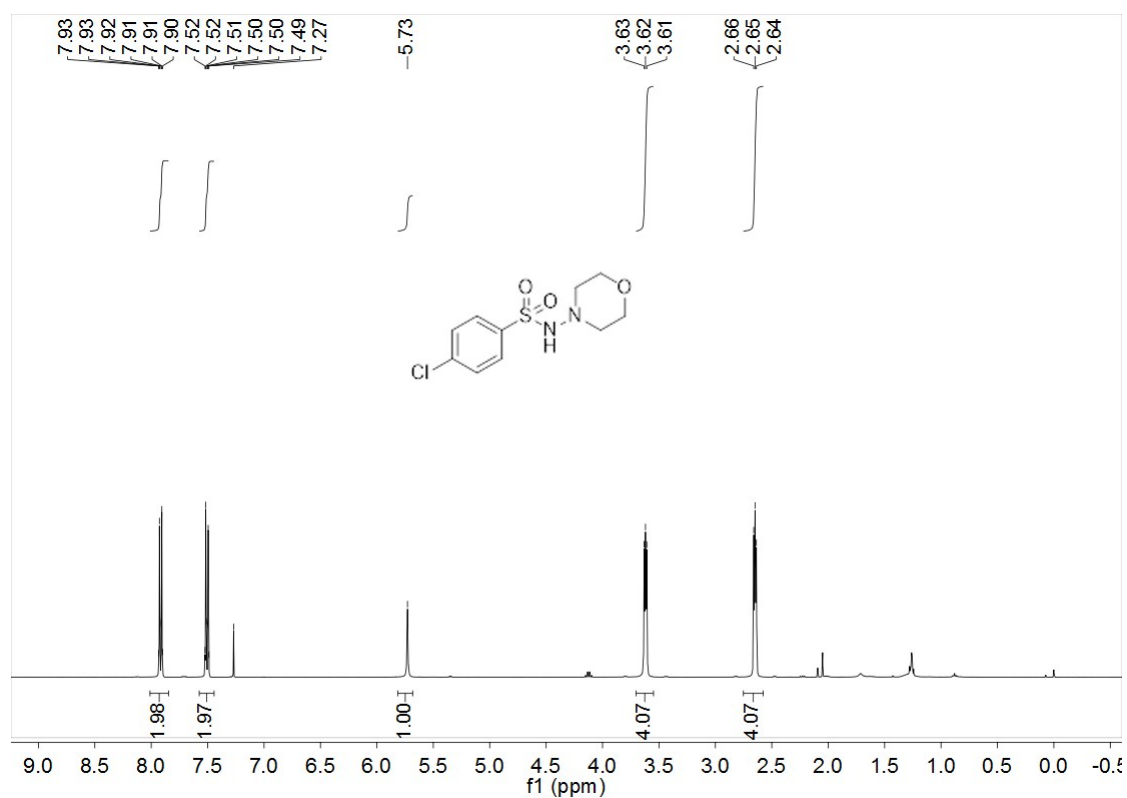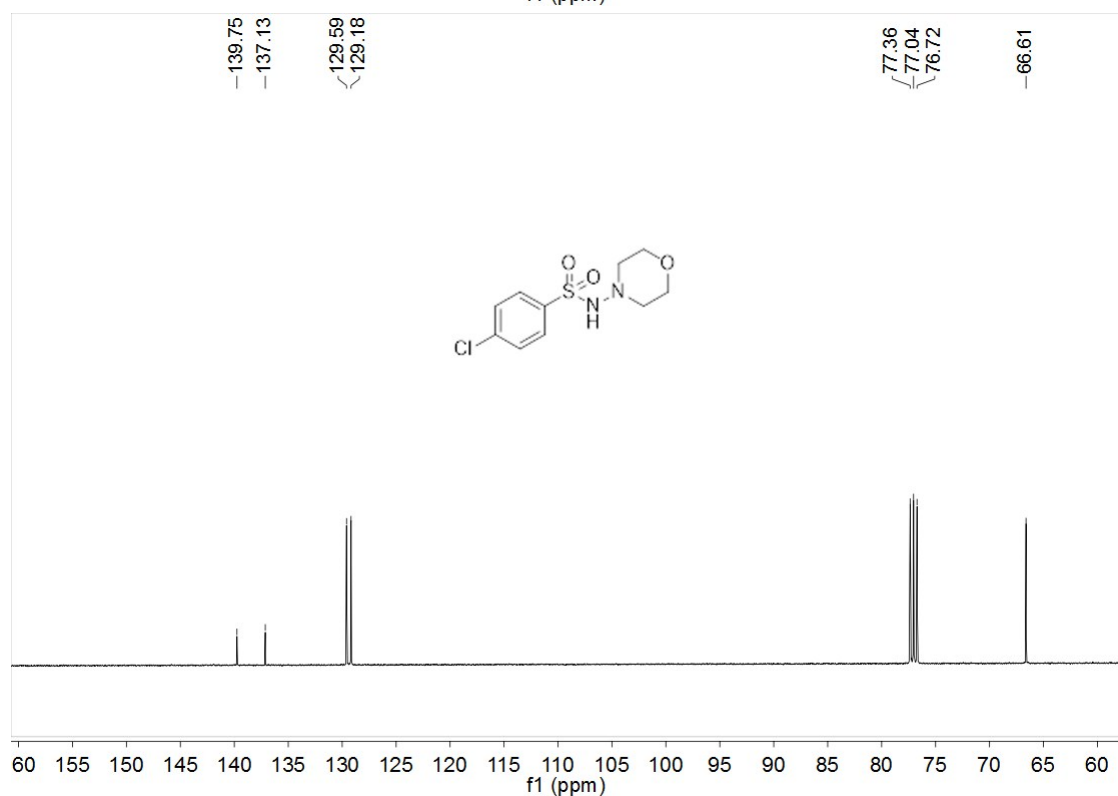



$^1\text{H}$  and  $^{13}\text{C}$  NMR for **3ga**

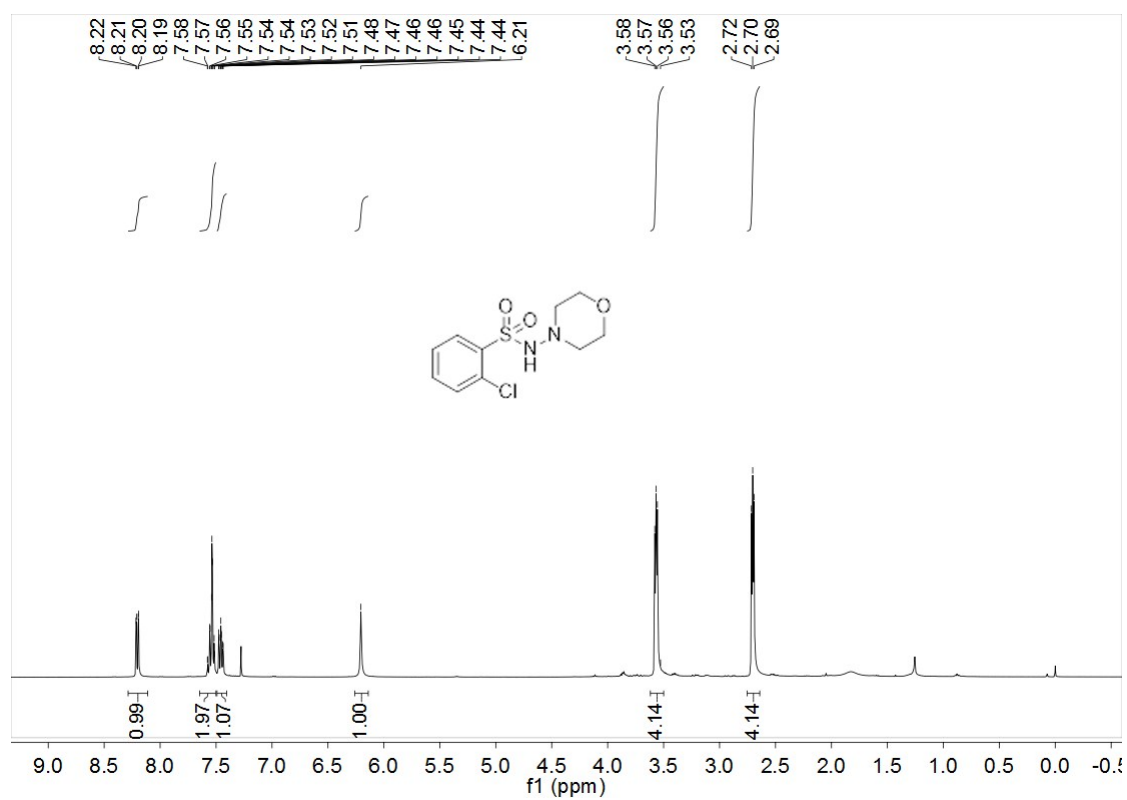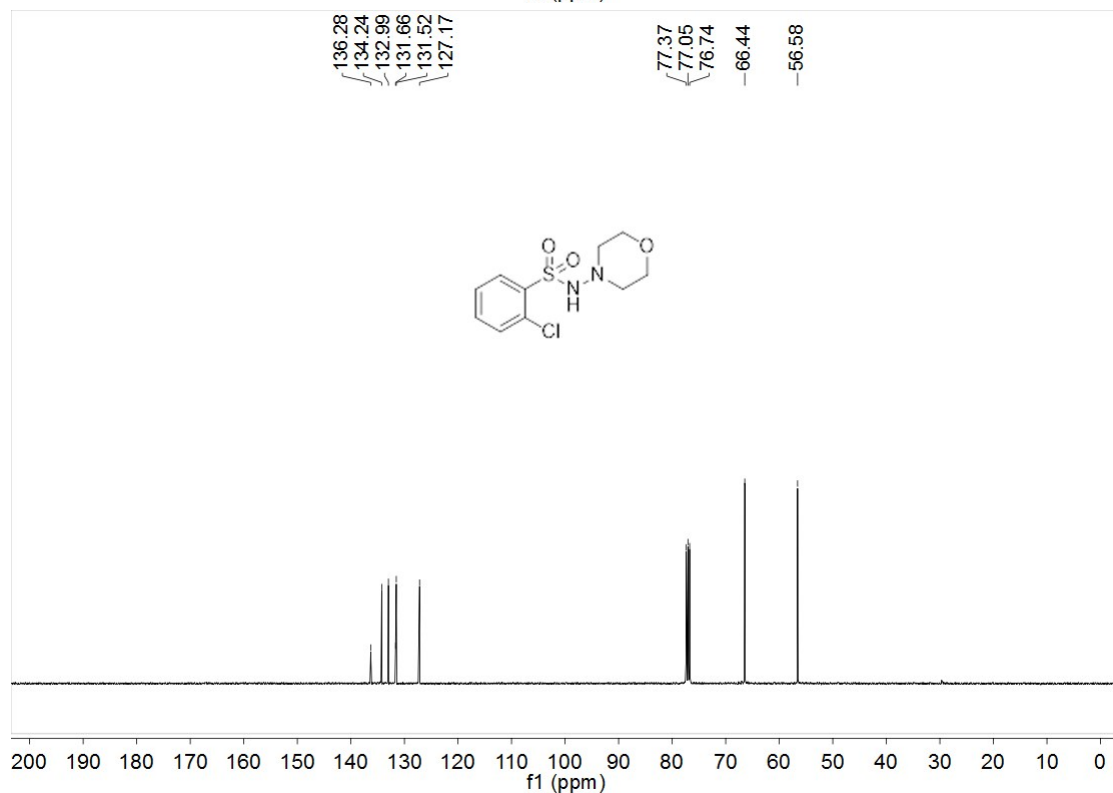

<sup>1</sup>H and <sup>13</sup>C NMR for **3ha**

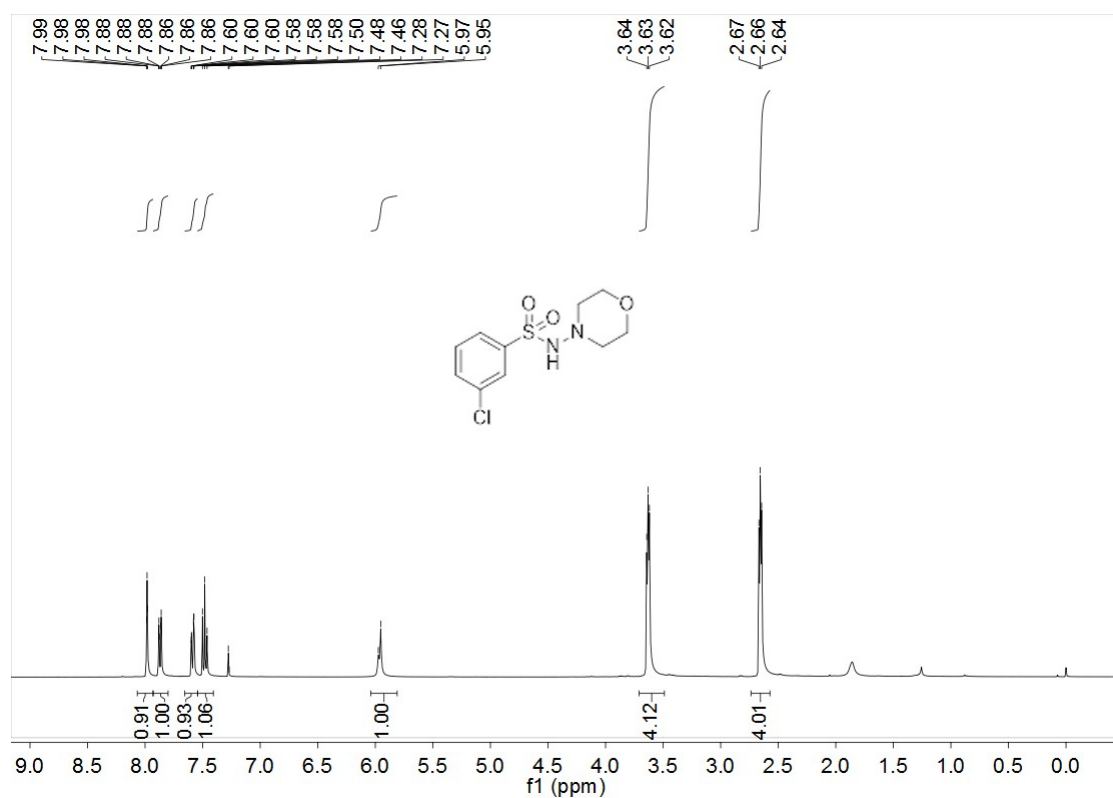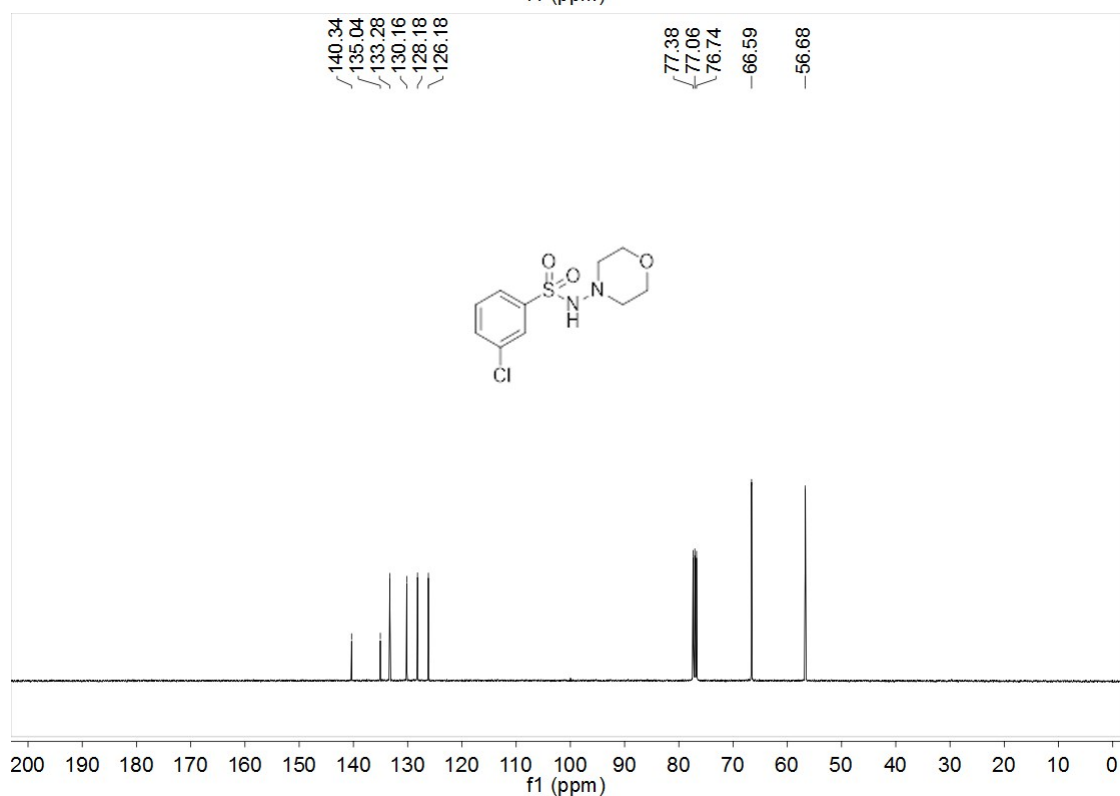

<sup>1</sup>H and <sup>13</sup>C NMR for **3ia**

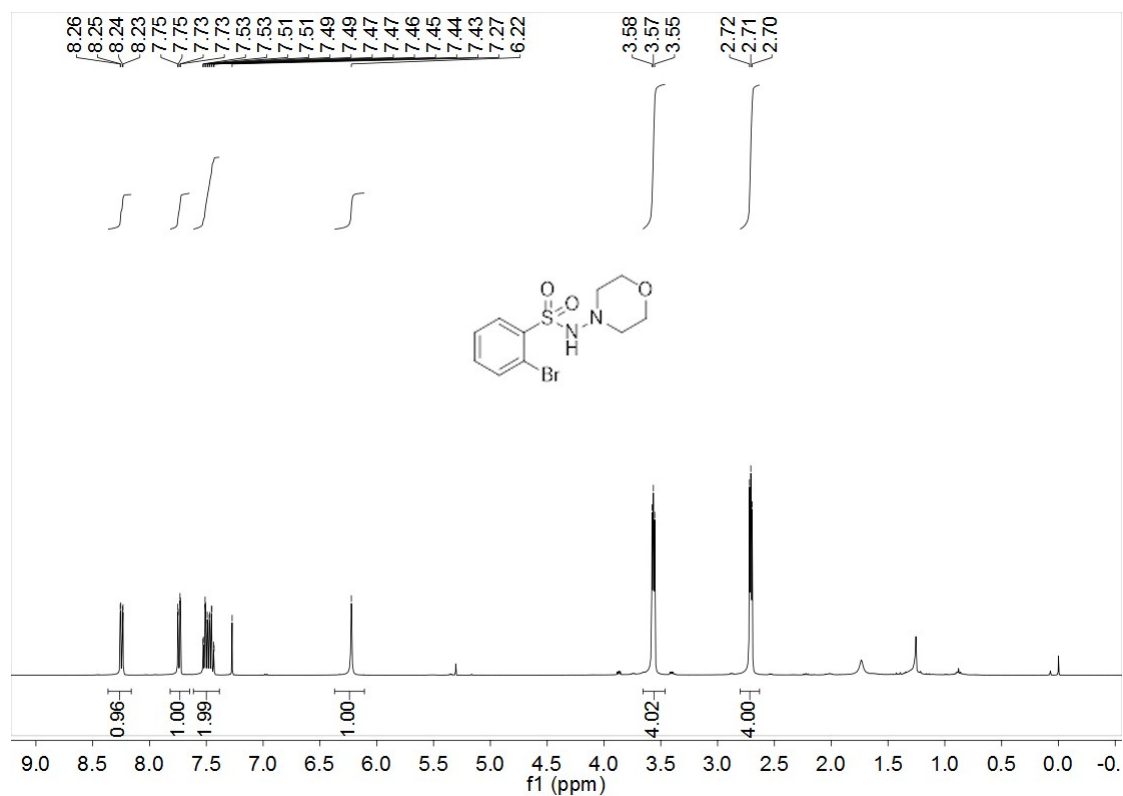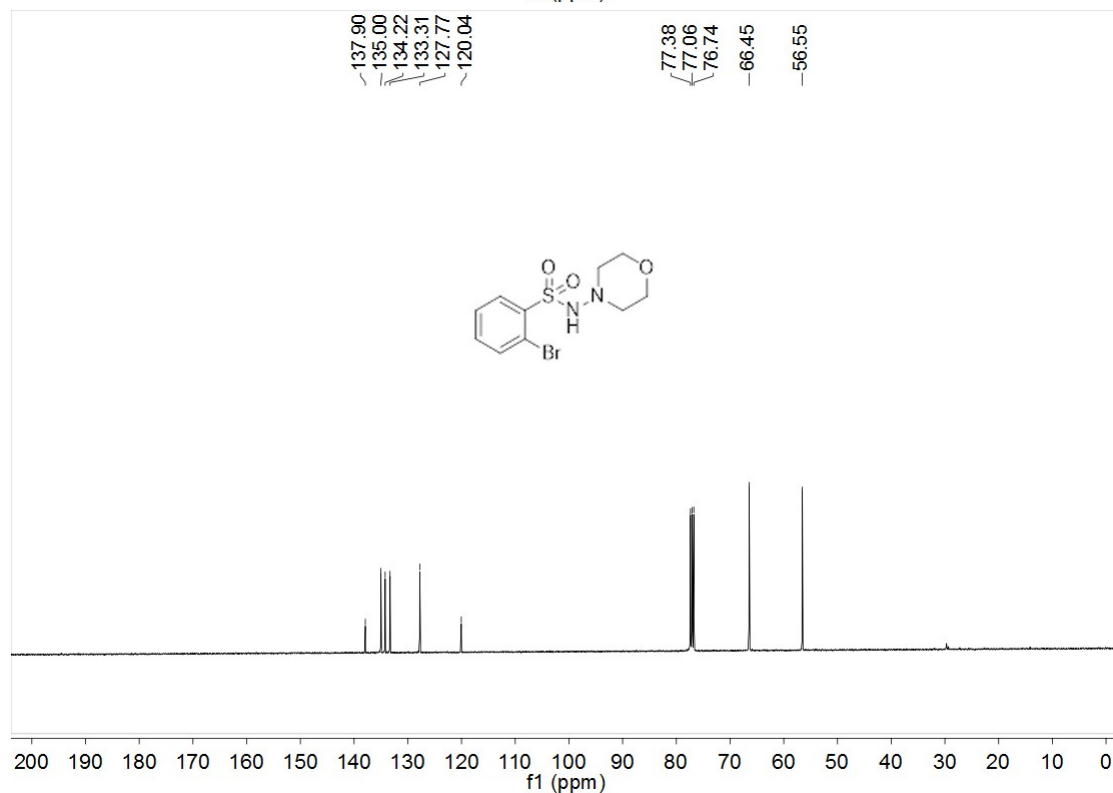

<sup>1</sup>H and <sup>13</sup>C NMR for **3ja**

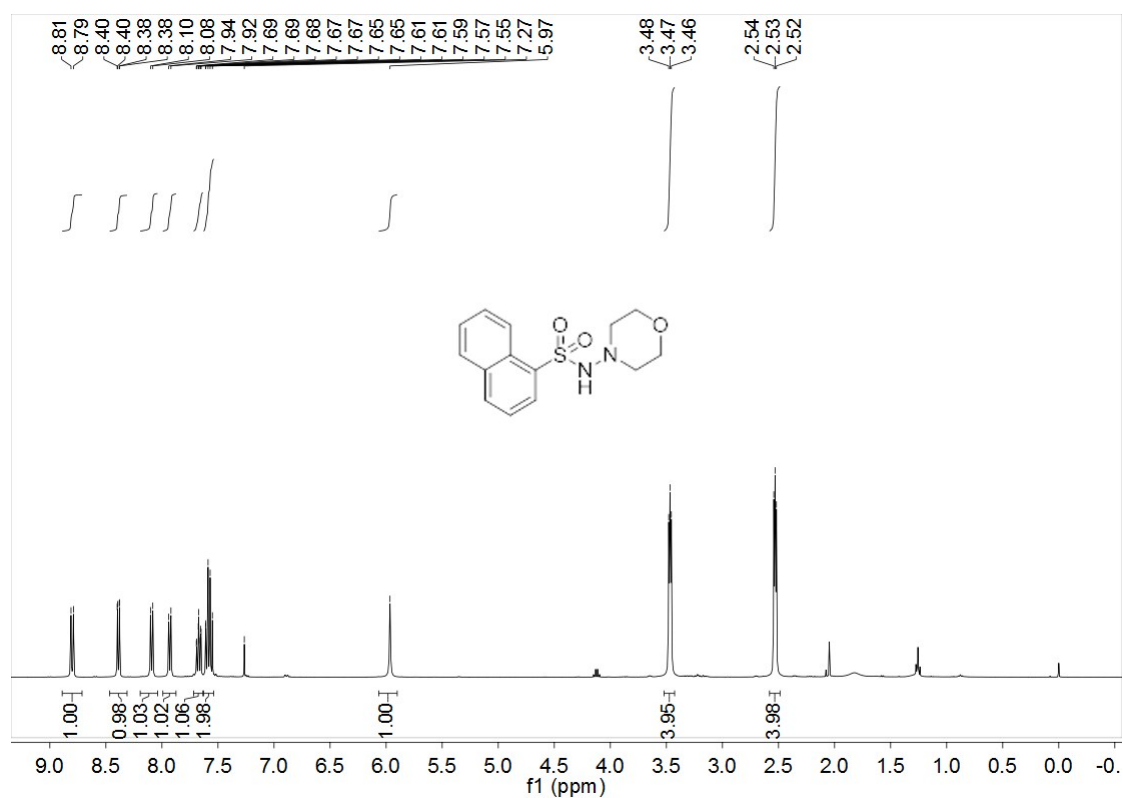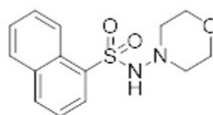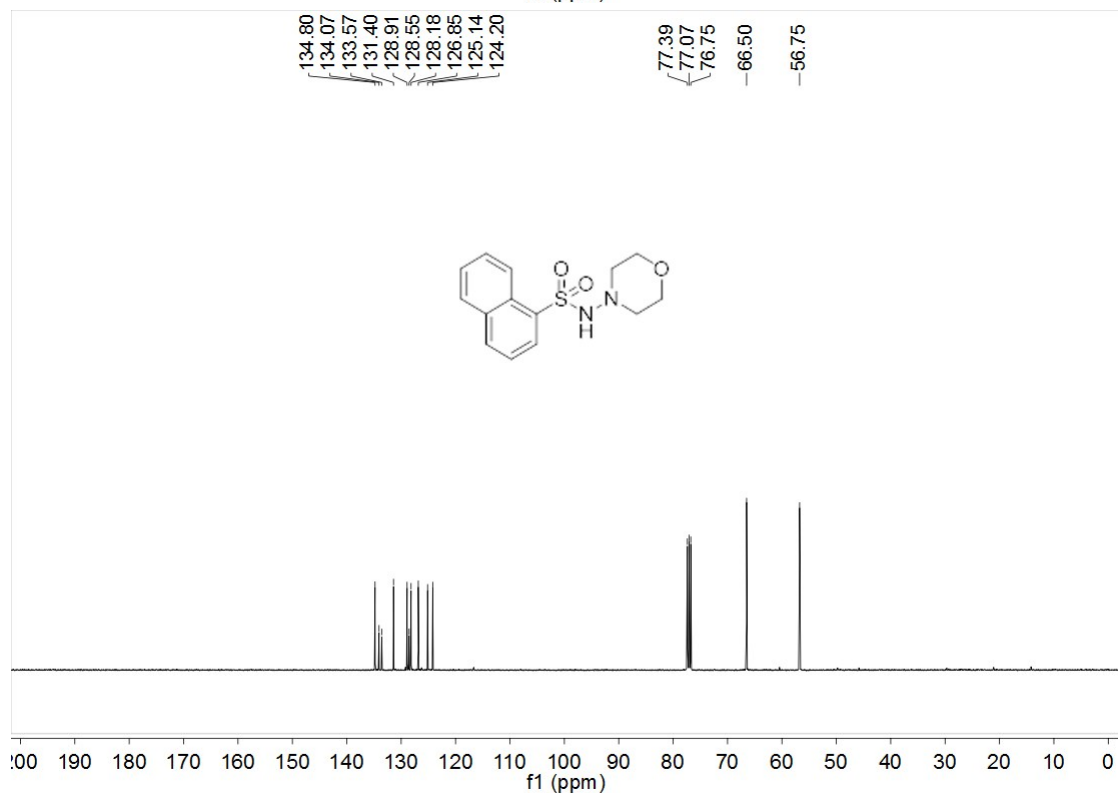



<sup>1</sup>H and <sup>13</sup>C NMR for **3ab**

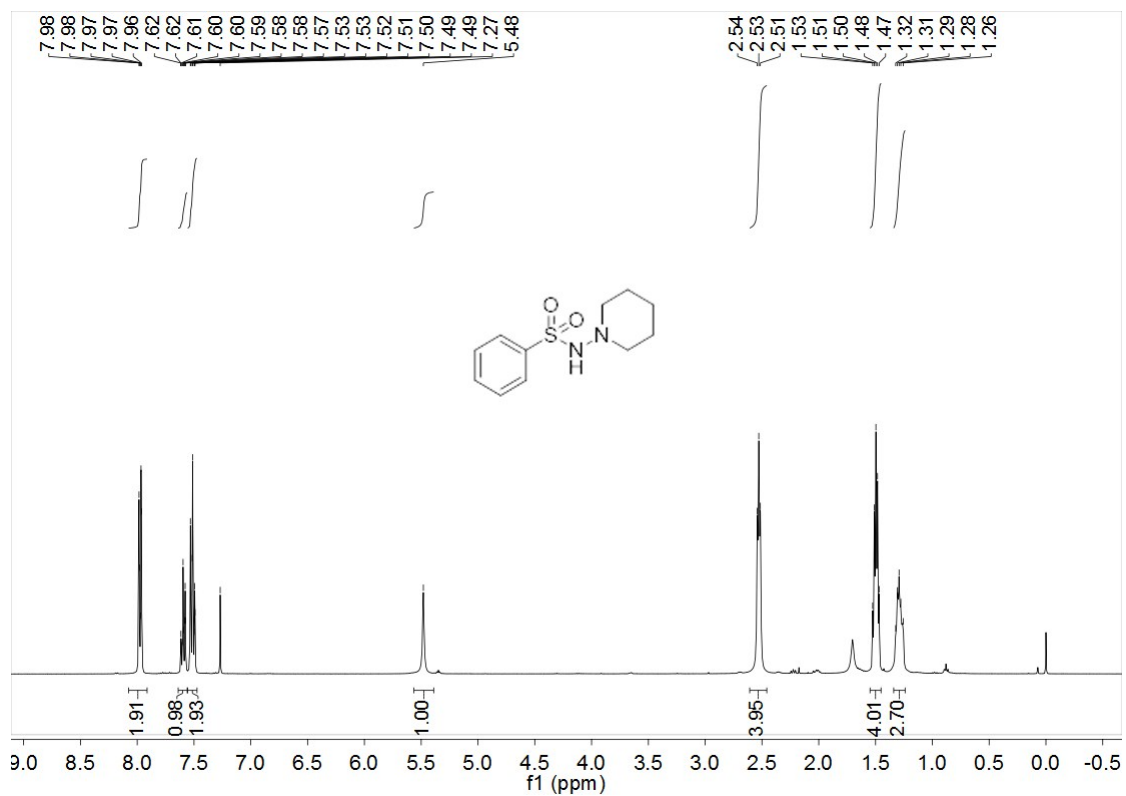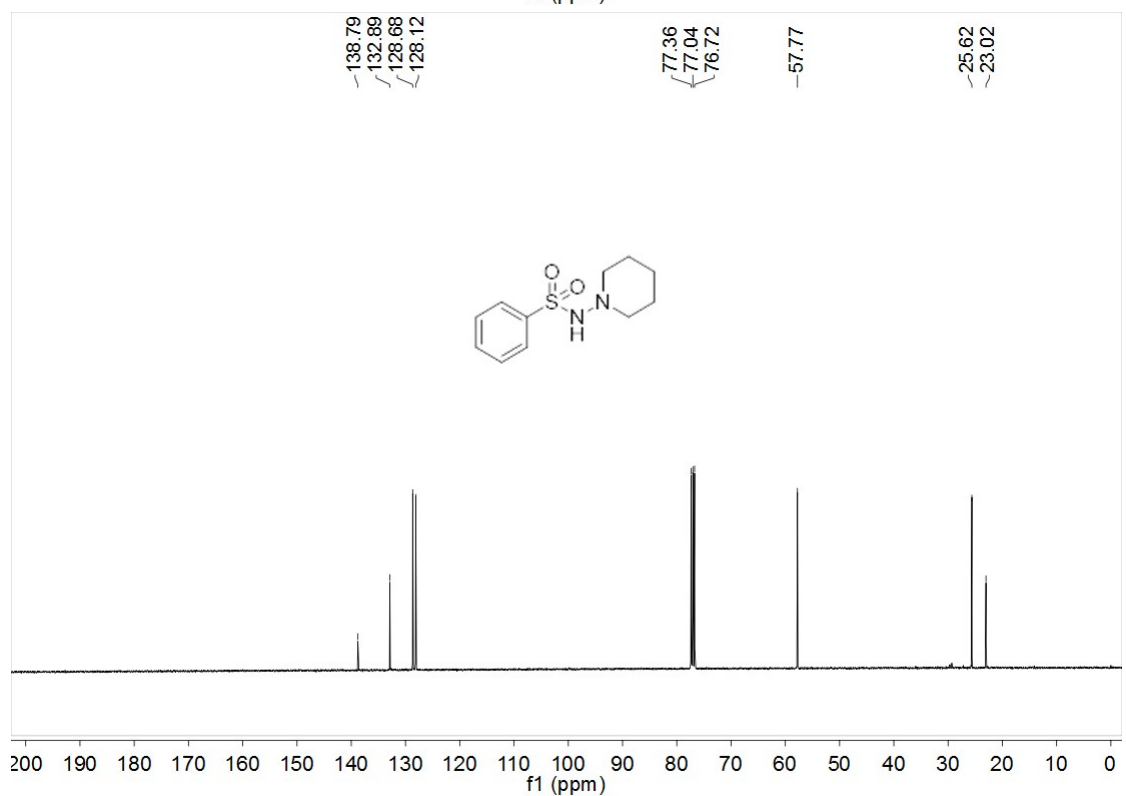

<sup>1</sup>H and <sup>13</sup>C NMR for **3ac**

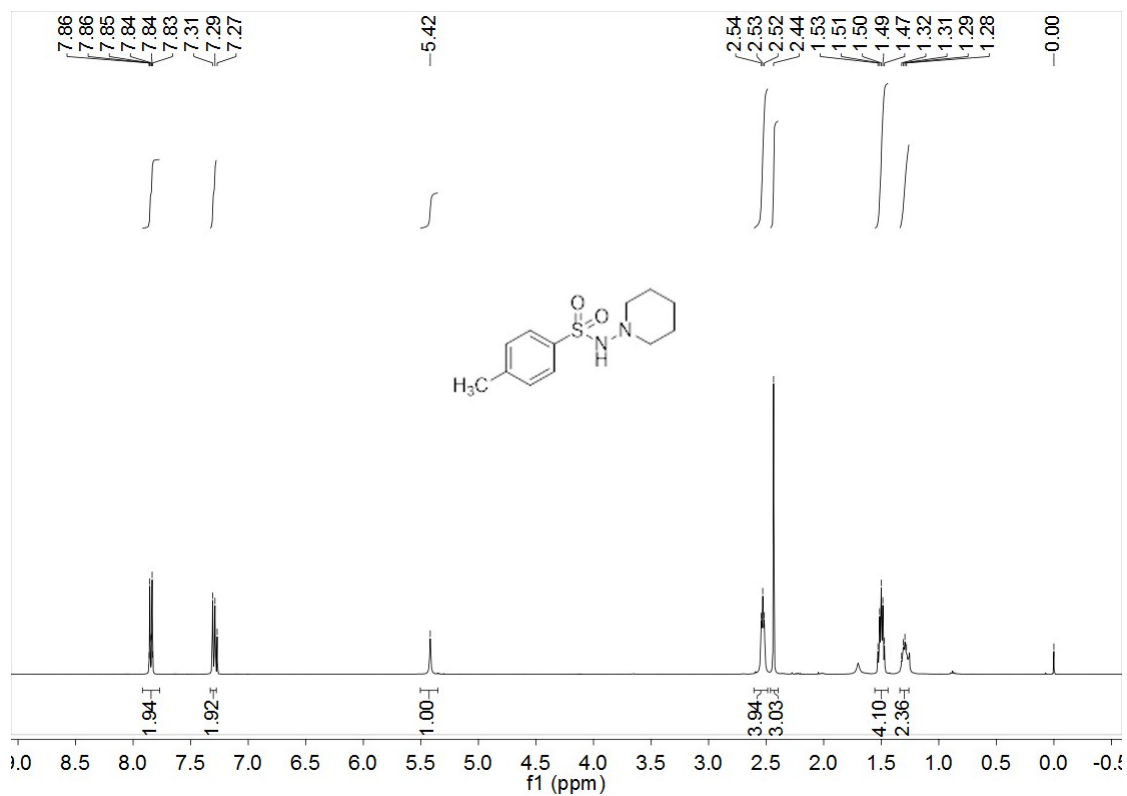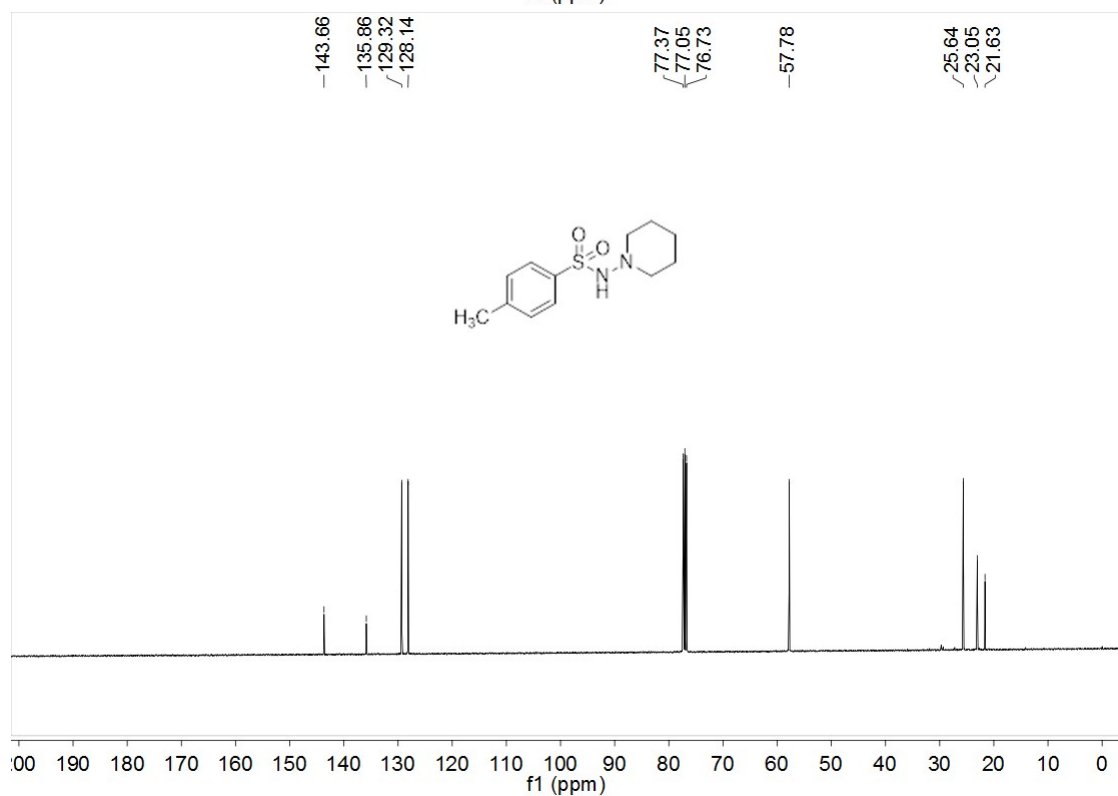

<sup>1</sup>H and <sup>13</sup>C NMR for **3ad**

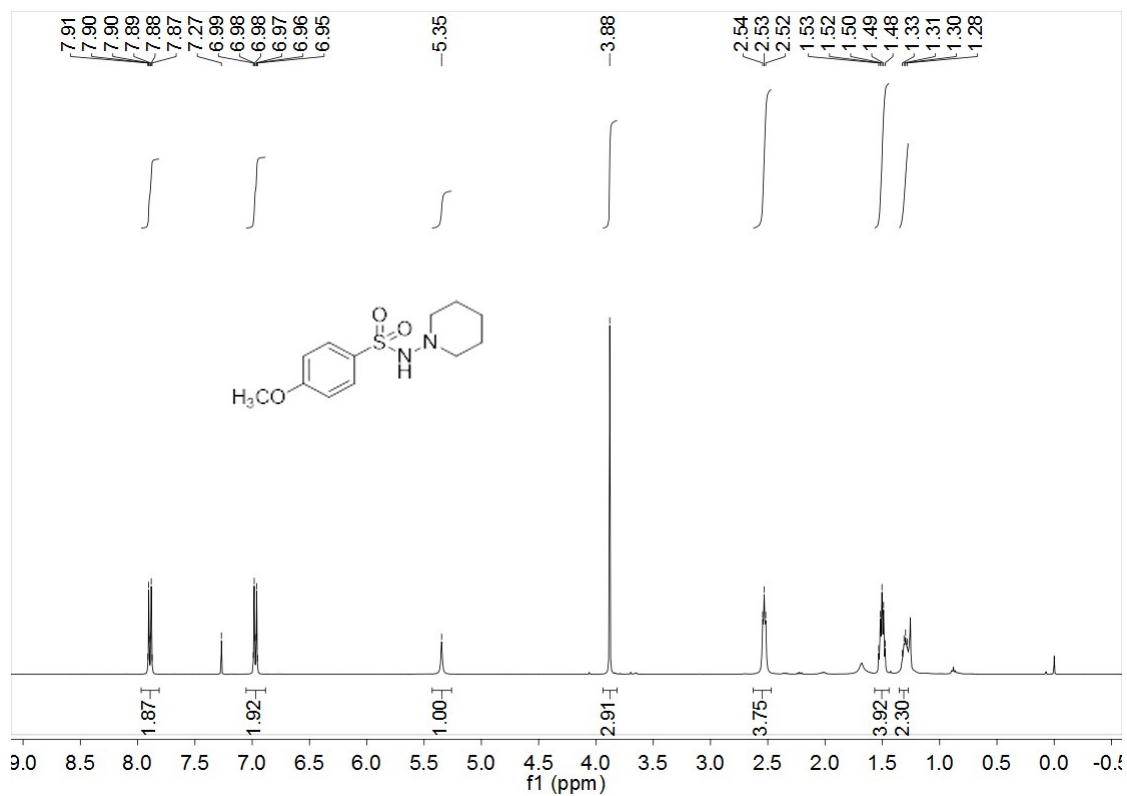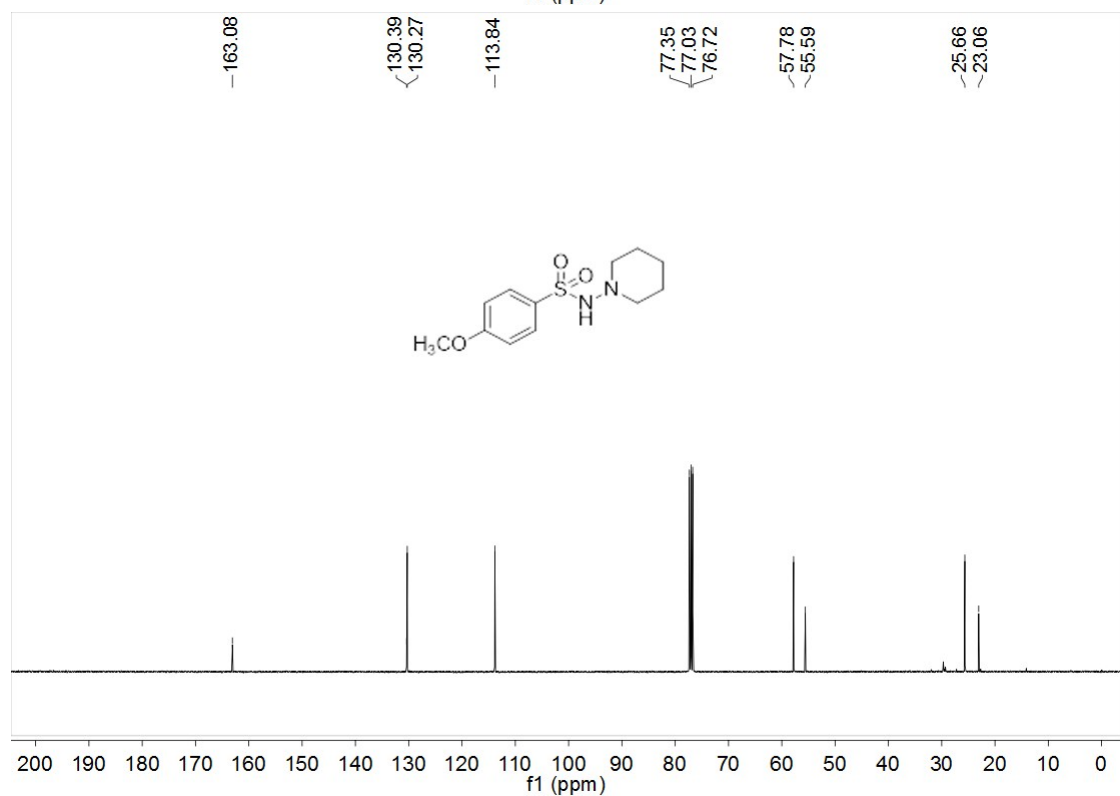



<sup>1</sup>H and <sup>13</sup>C NMR for **3ae**

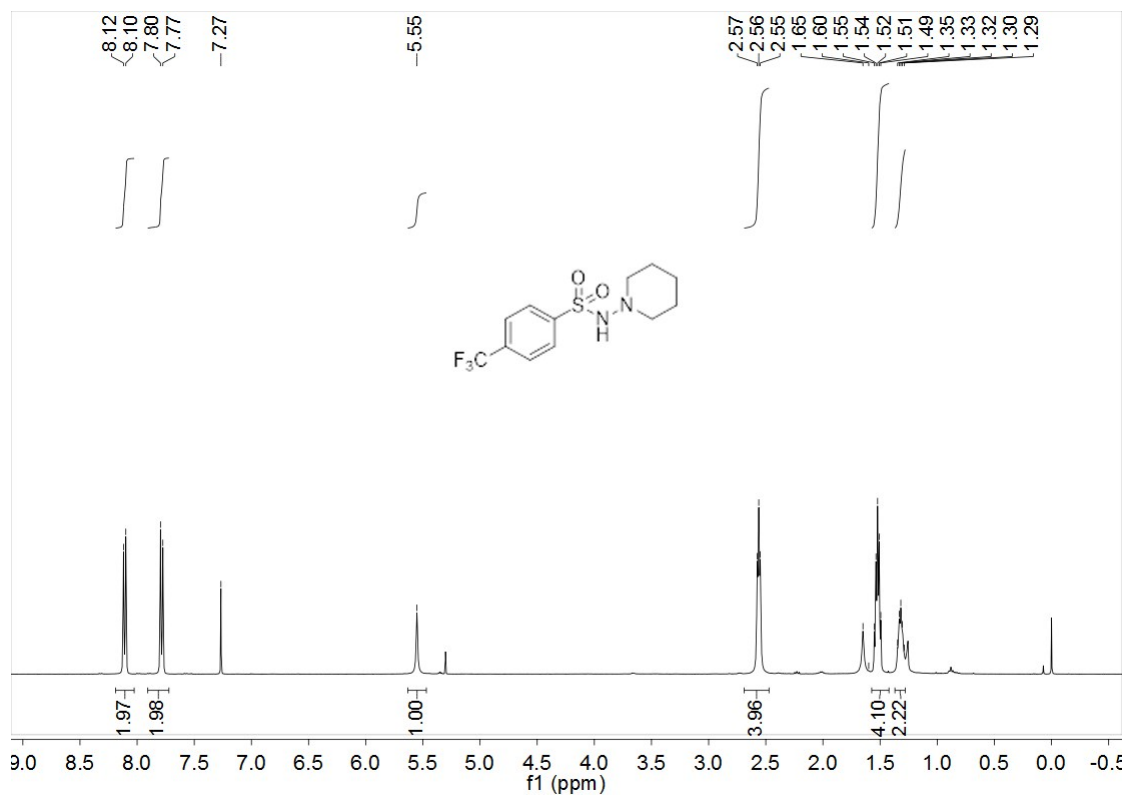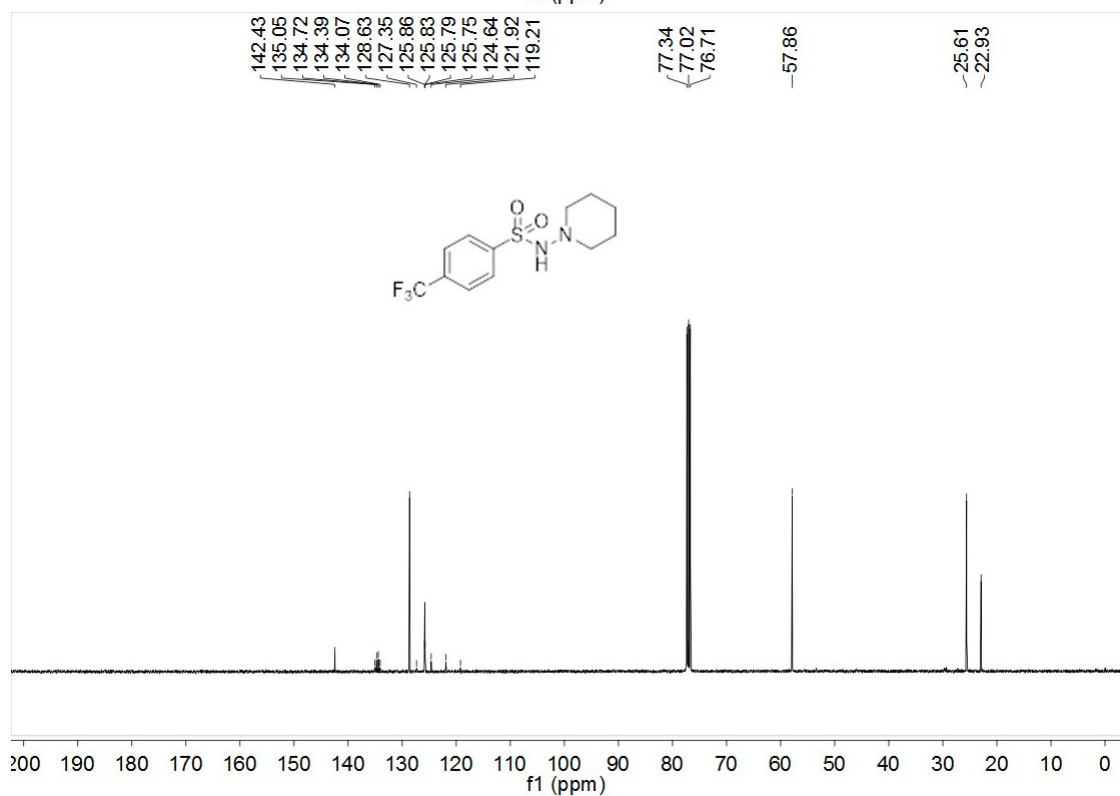

<sup>1</sup>H and <sup>13</sup>C NMR for **3af**

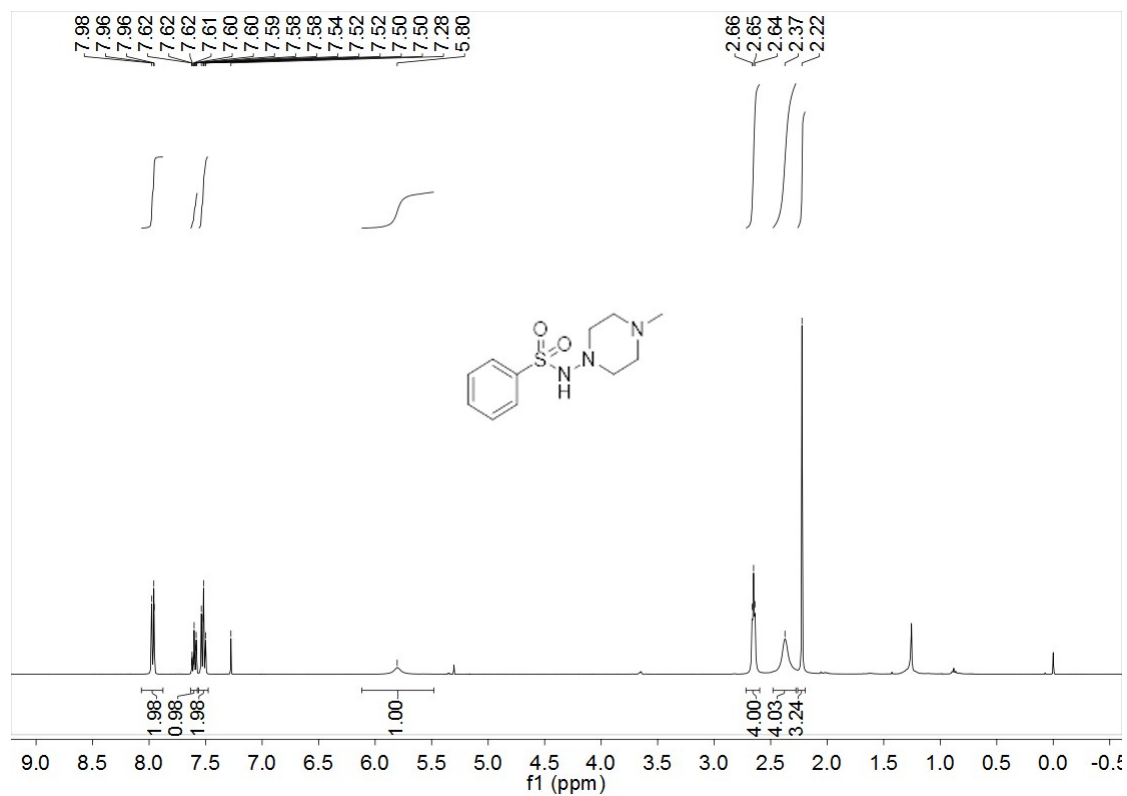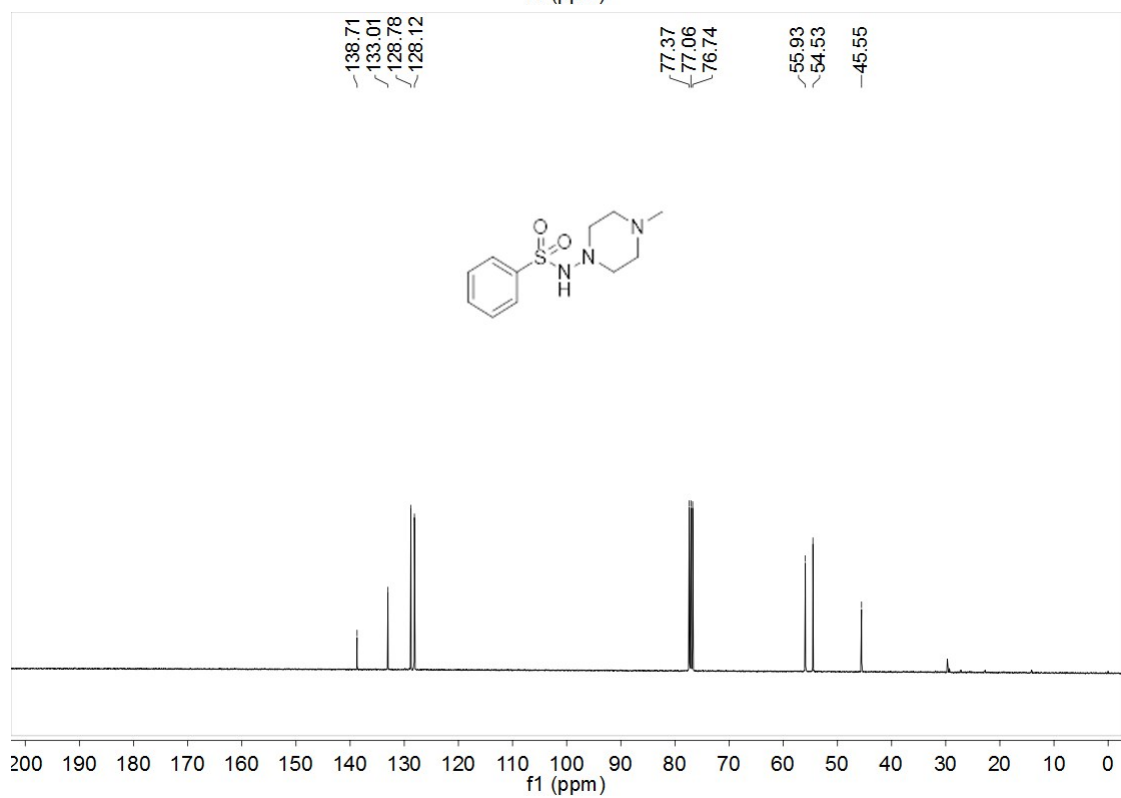

<sup>1</sup>H and <sup>13</sup>C NMR for **3ag**

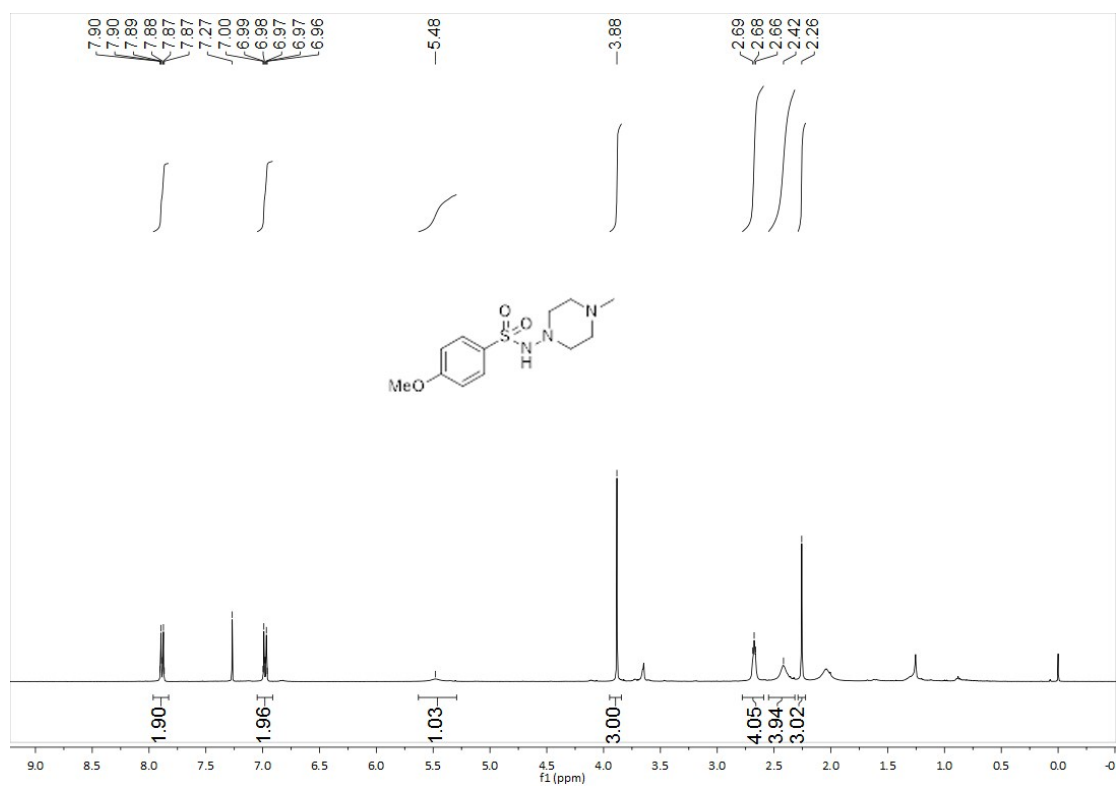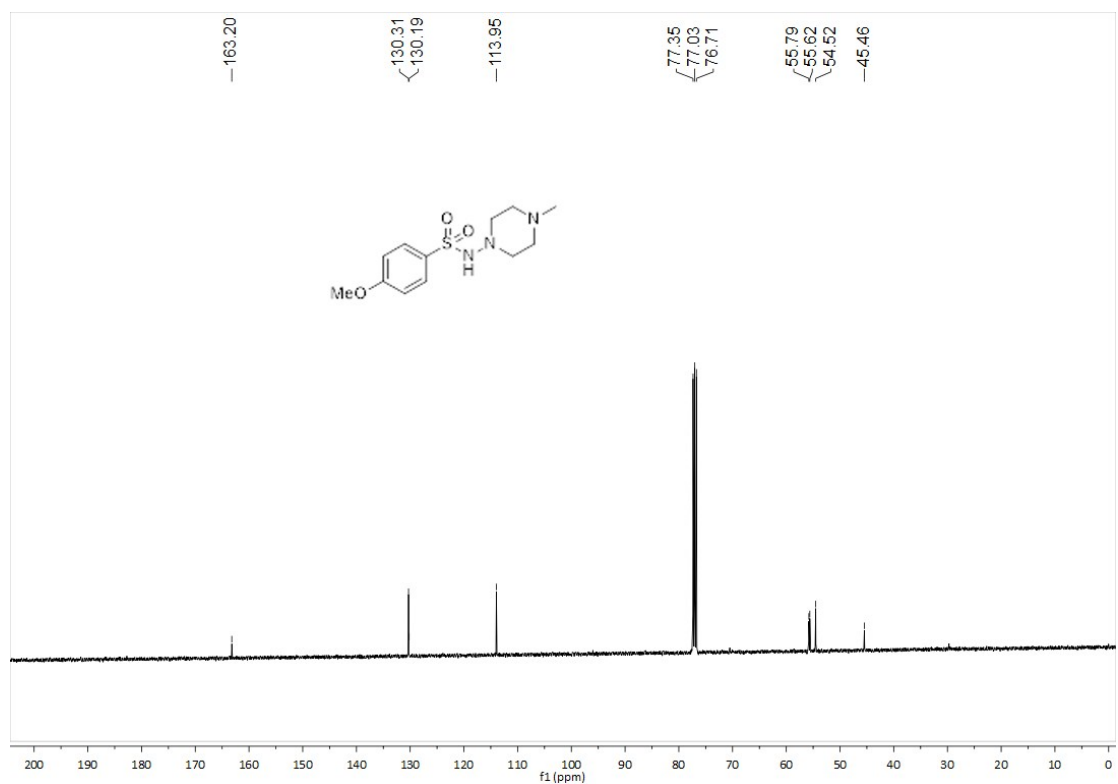

# <sup>1</sup>H and <sup>13</sup>C NMR for 3ah

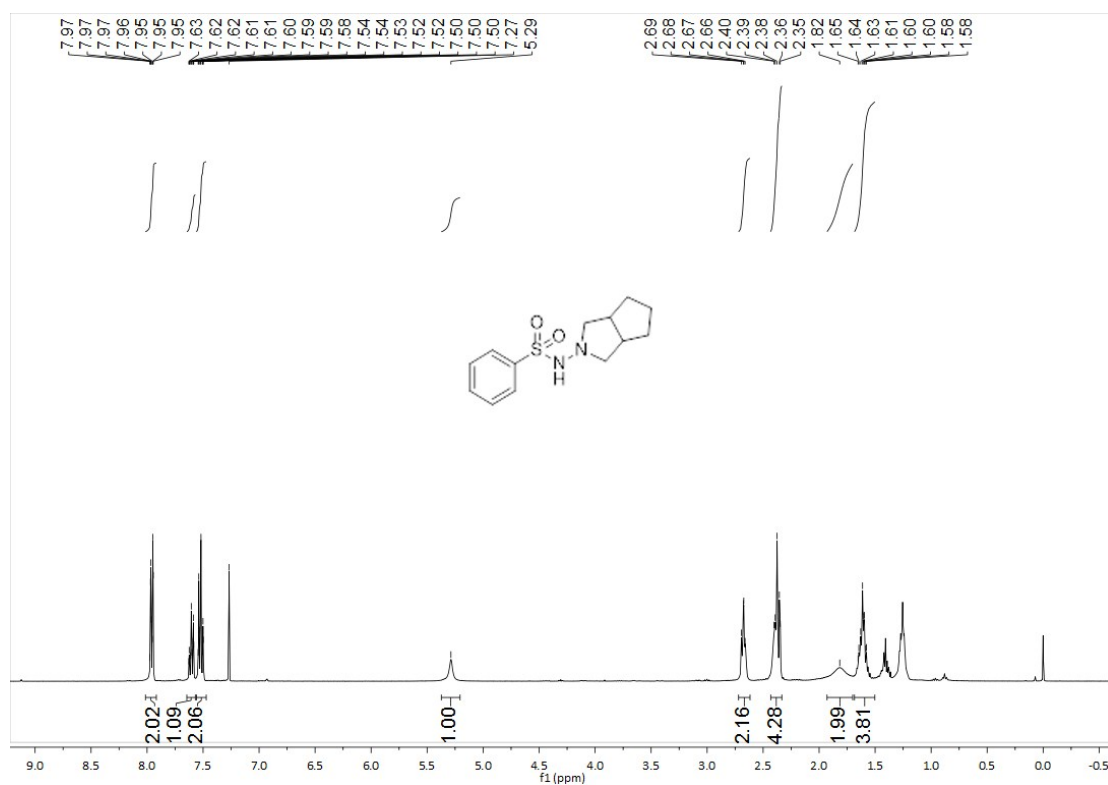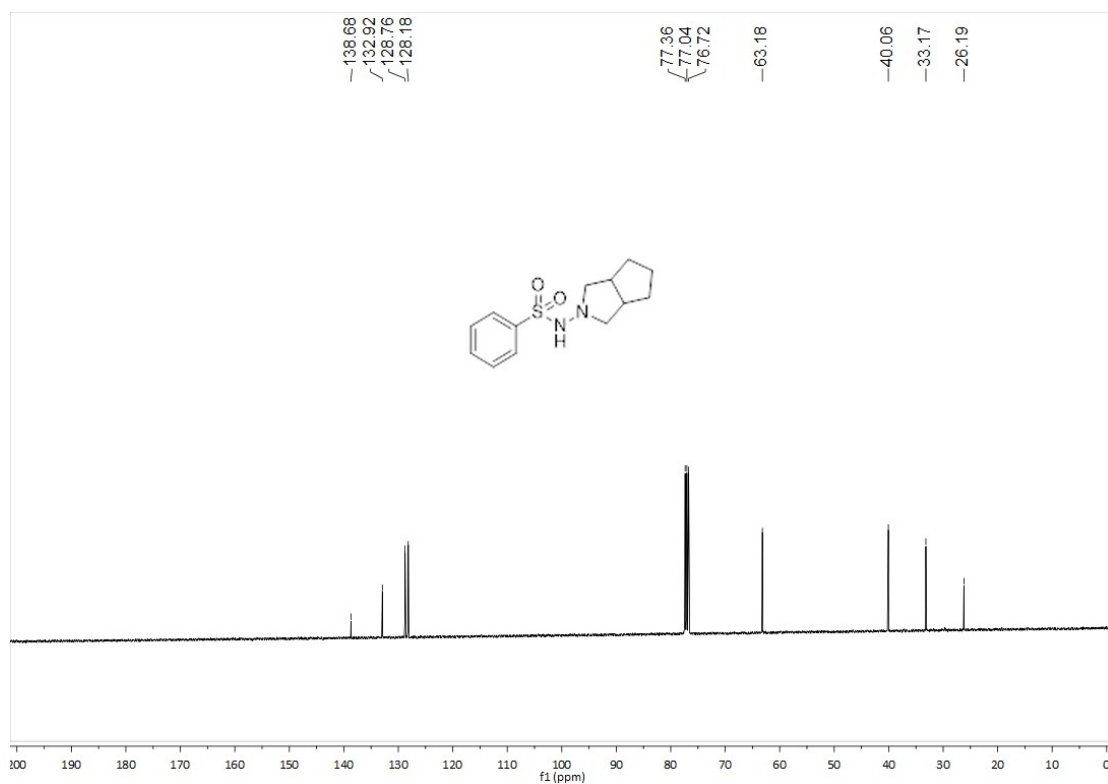

# <sup>1</sup>H and <sup>13</sup>C NMR for 3ai

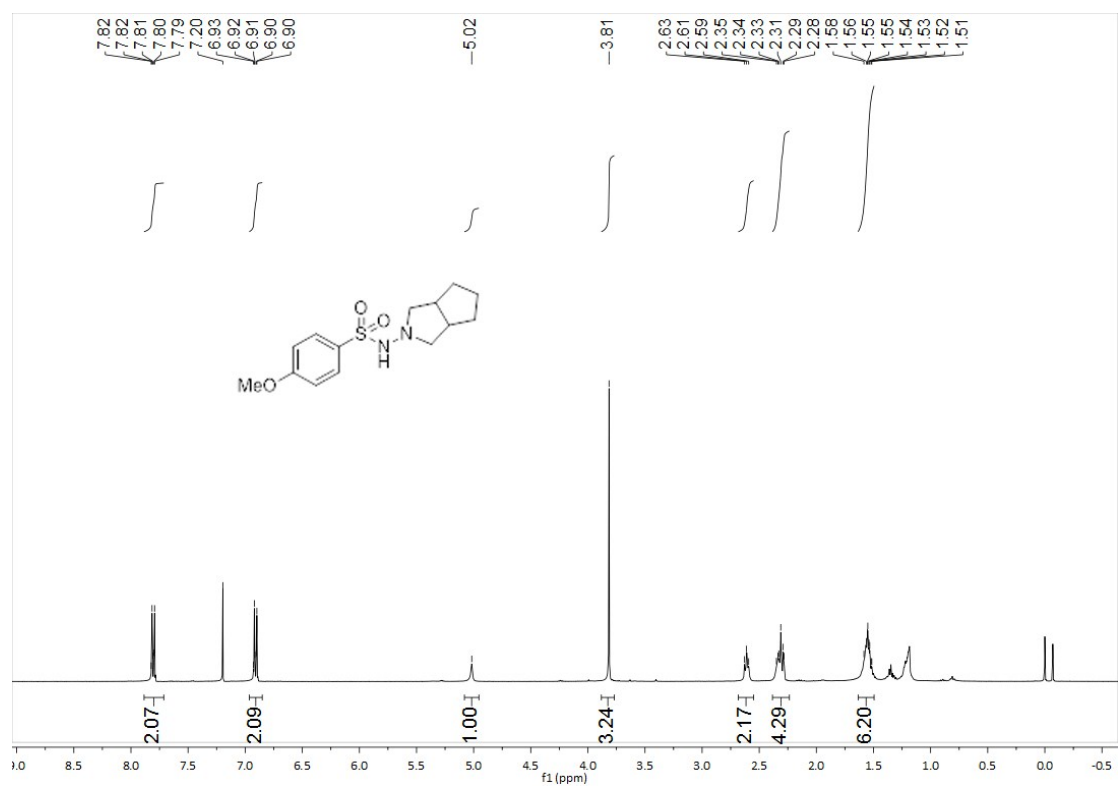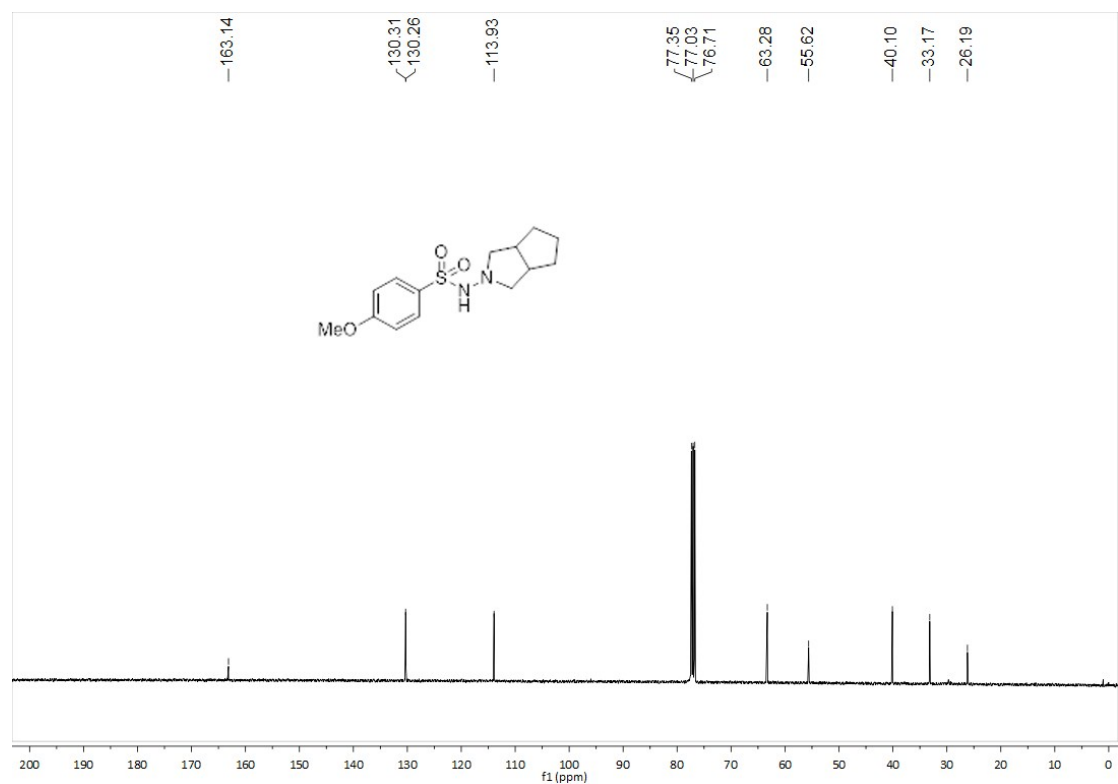

<sup>1</sup>H and <sup>13</sup>C NMR for 3aj

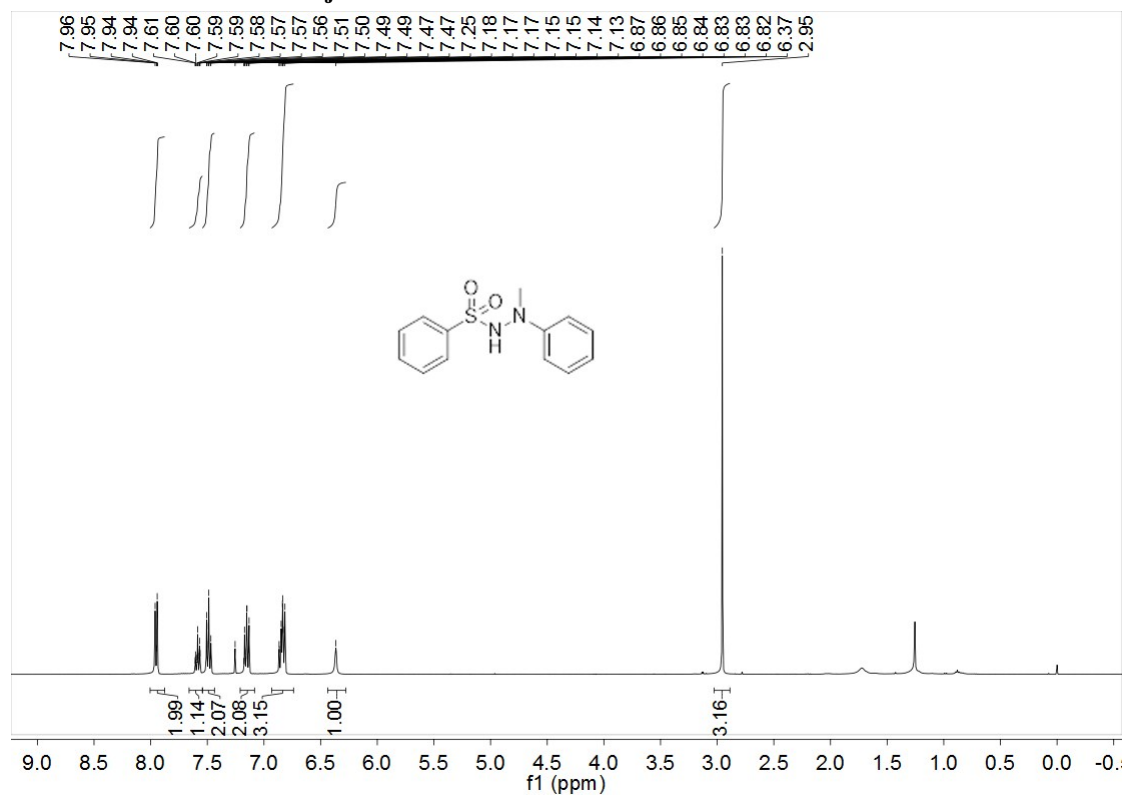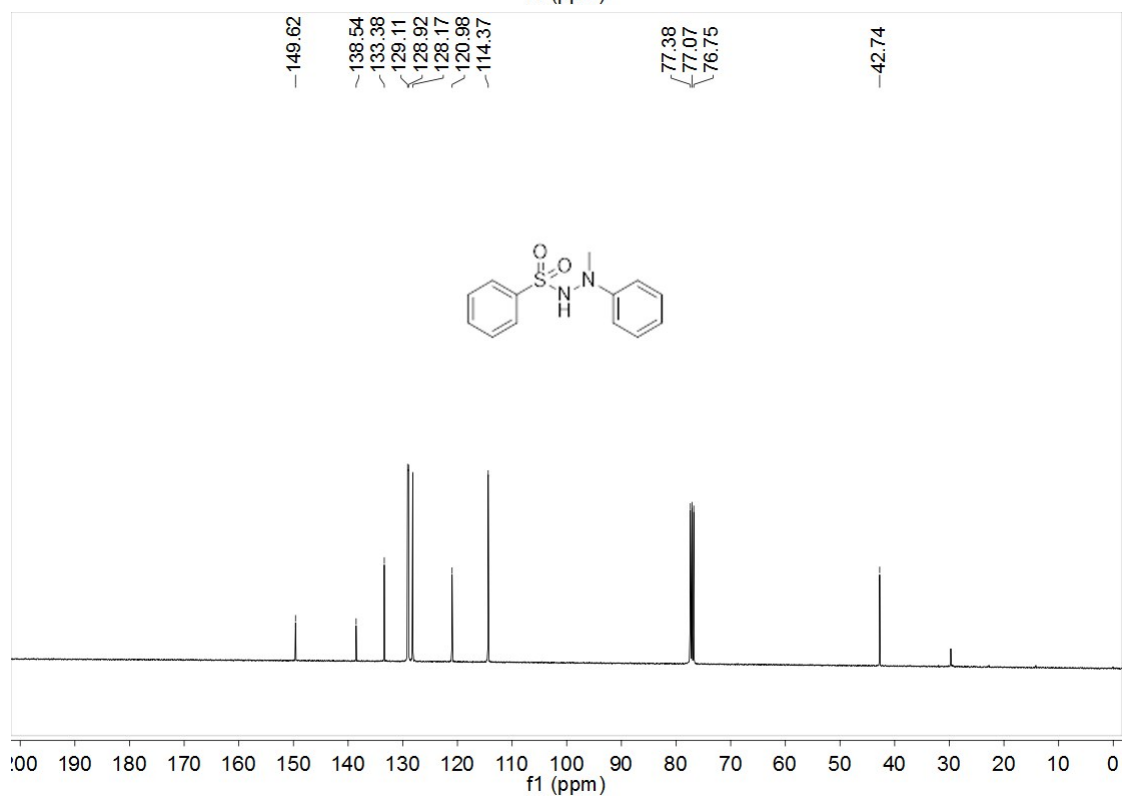

<sup>1</sup>H and <sup>13</sup>C NMR for **3ak**

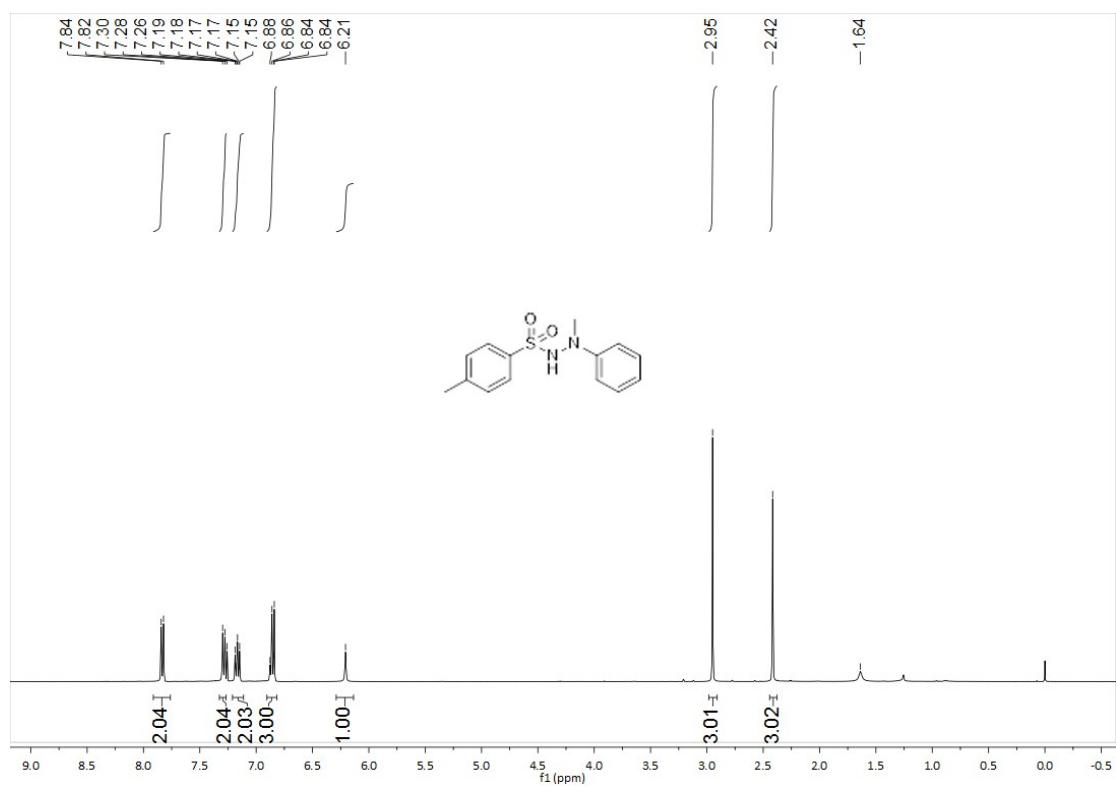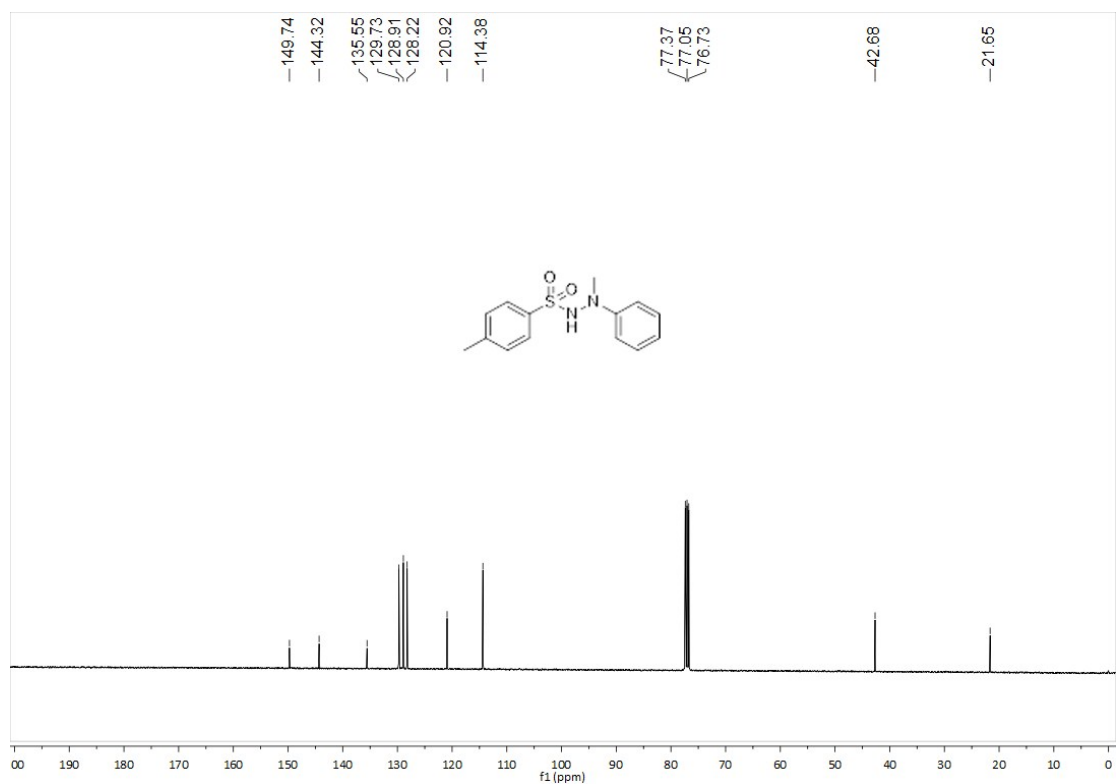

<sup>1</sup>H and <sup>13</sup>C NMR for **3a**

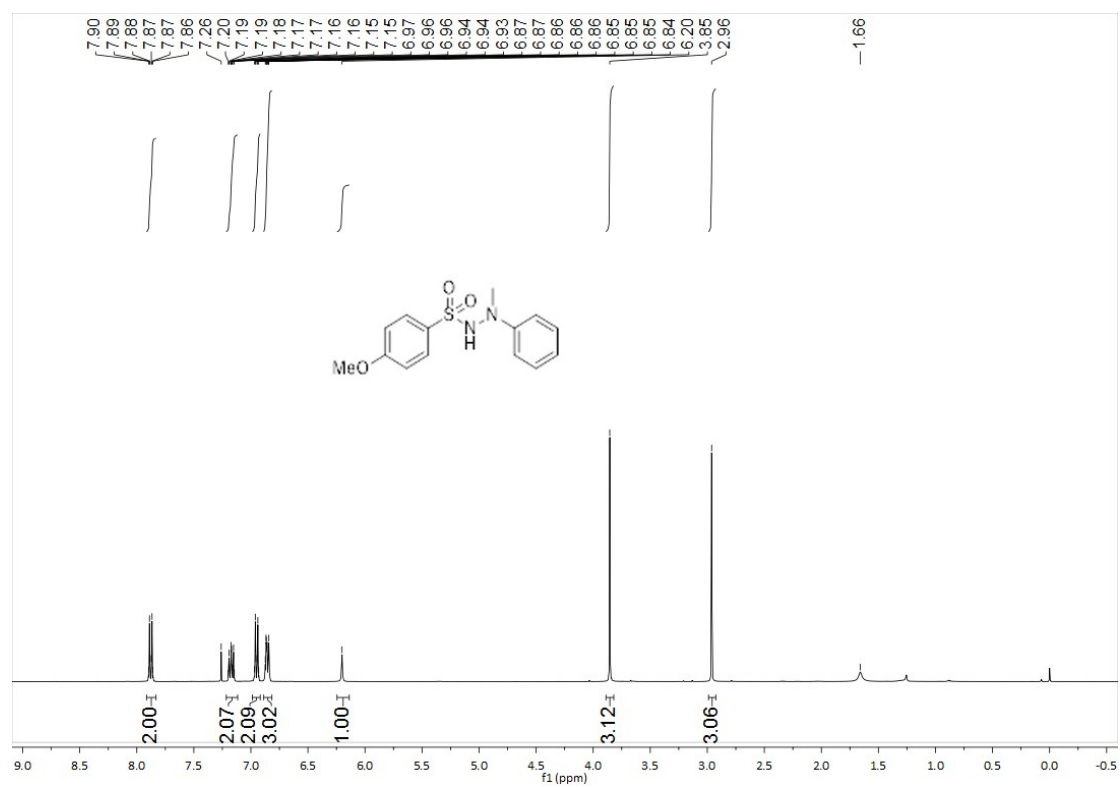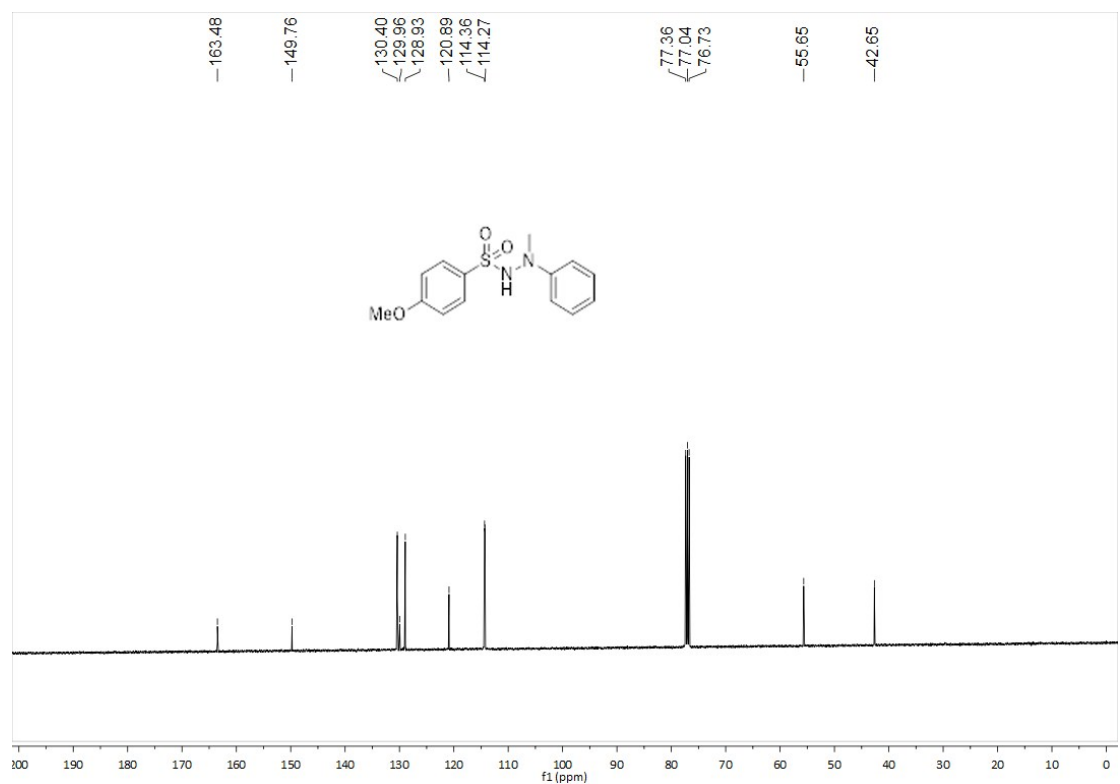



<sup>1</sup>H and <sup>13</sup>C NMR for **3ap**

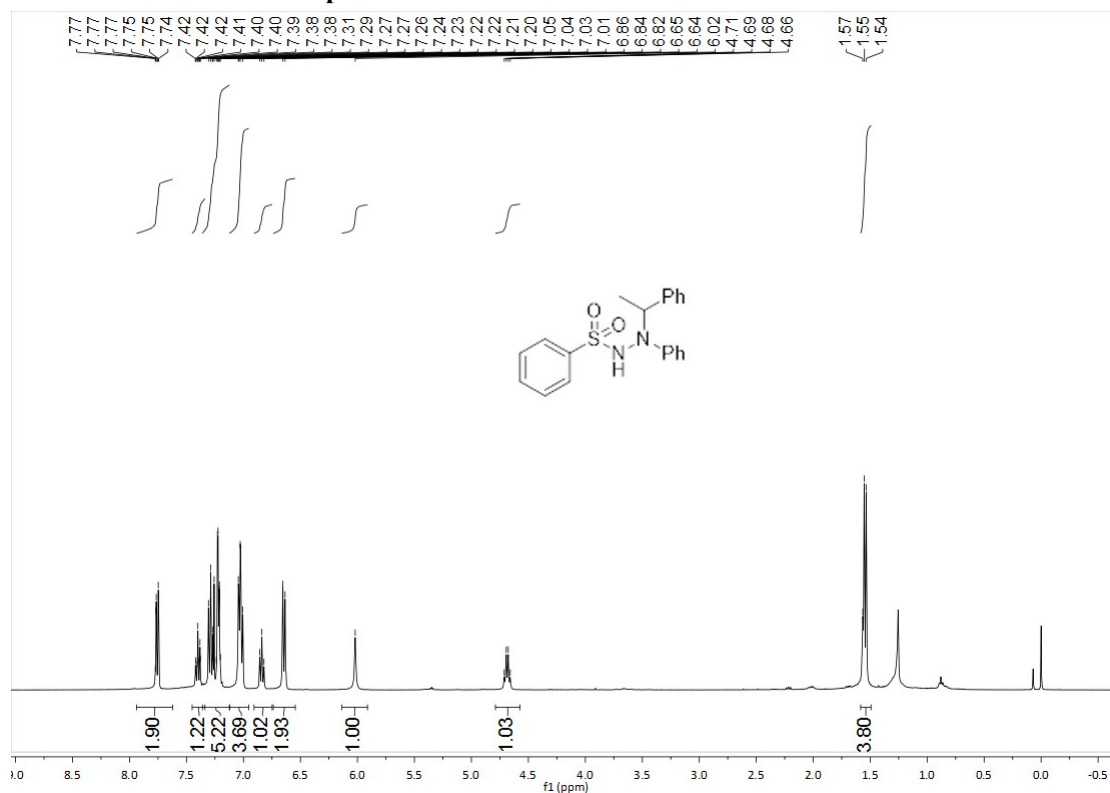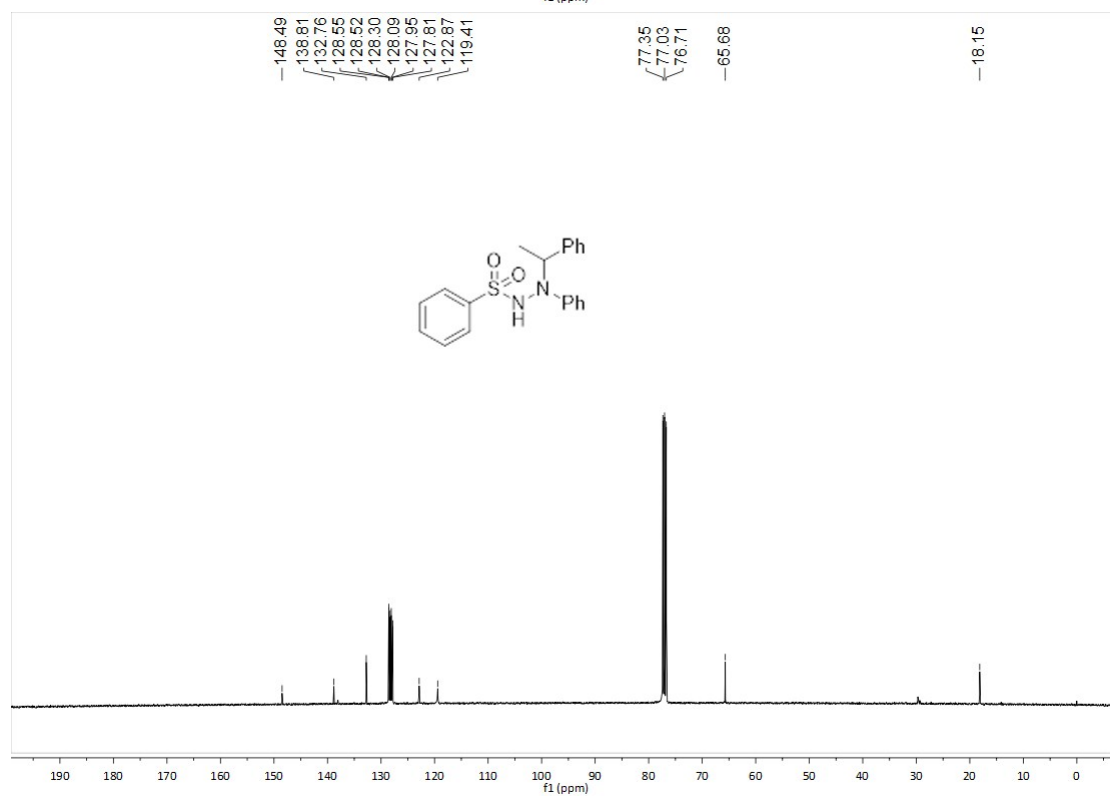

<sup>1</sup>H and <sup>13</sup>C NMR for **3ar**

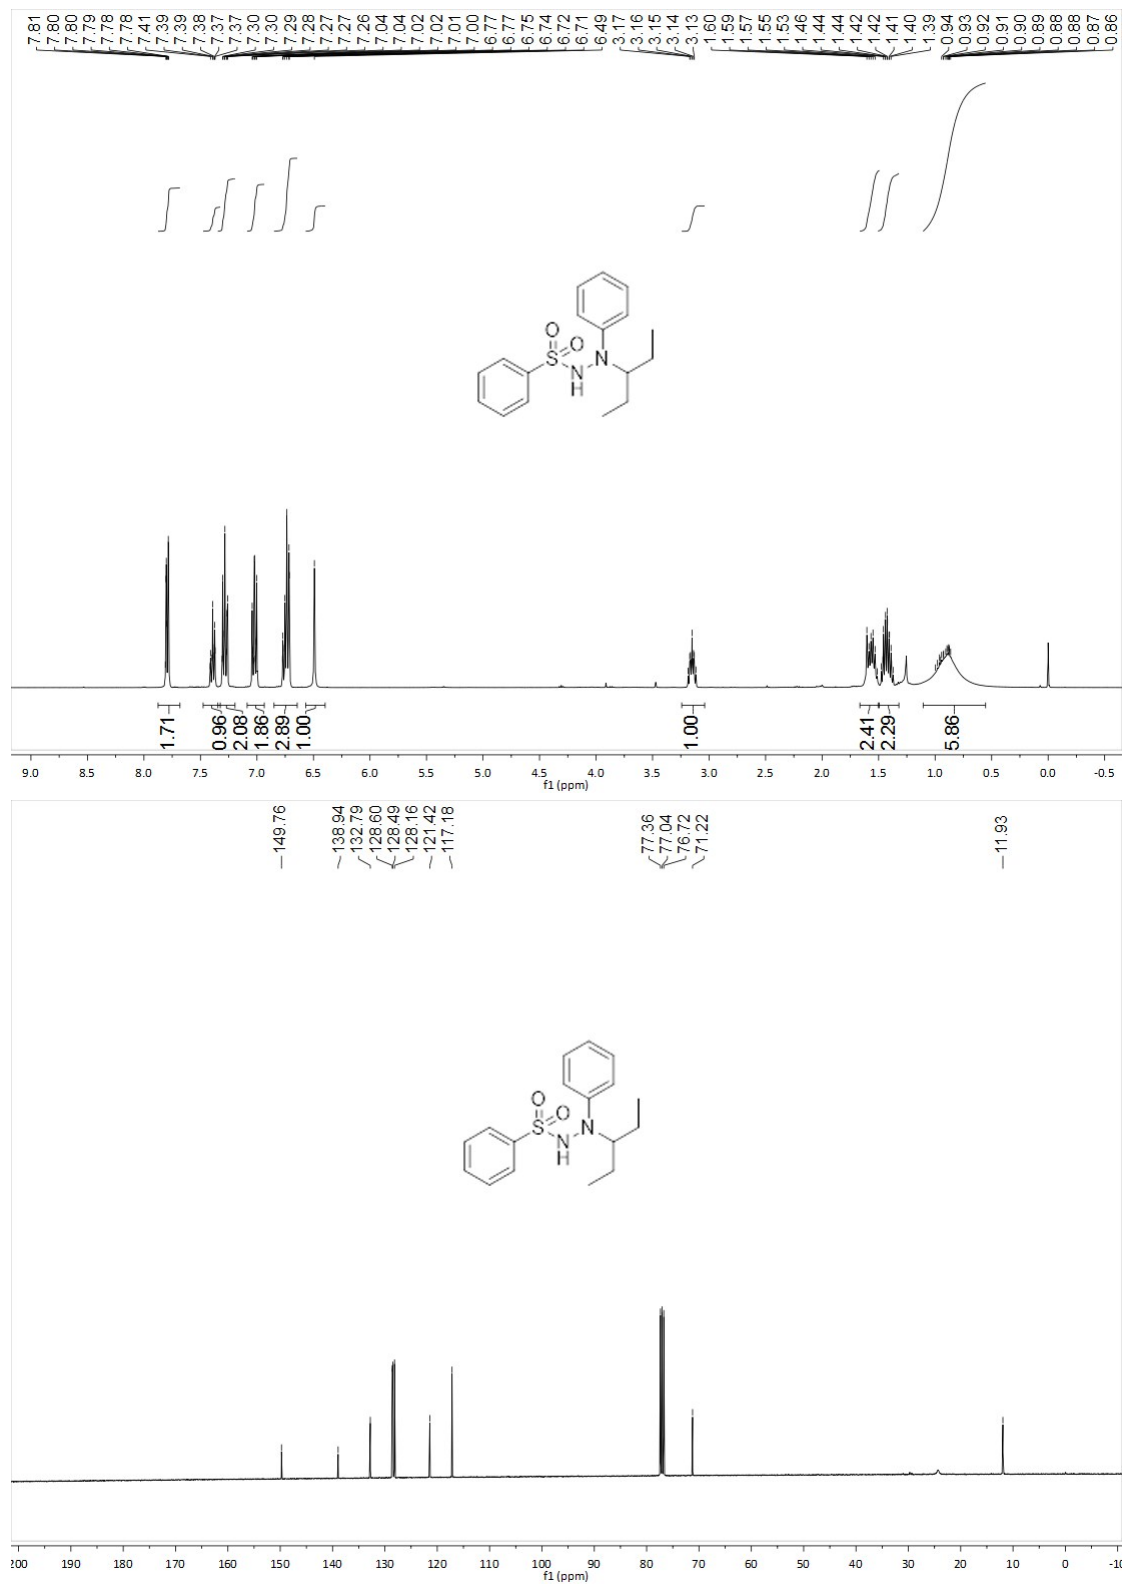

<sup>1</sup>H and <sup>13</sup>C NMR for 4

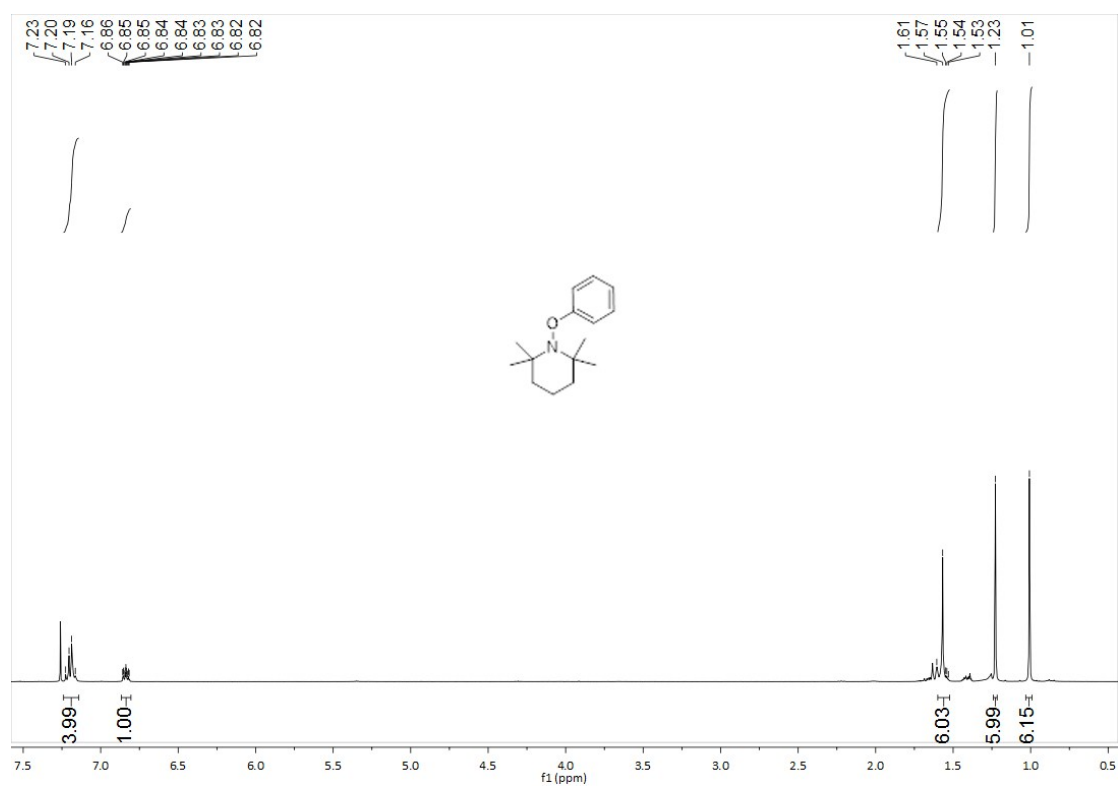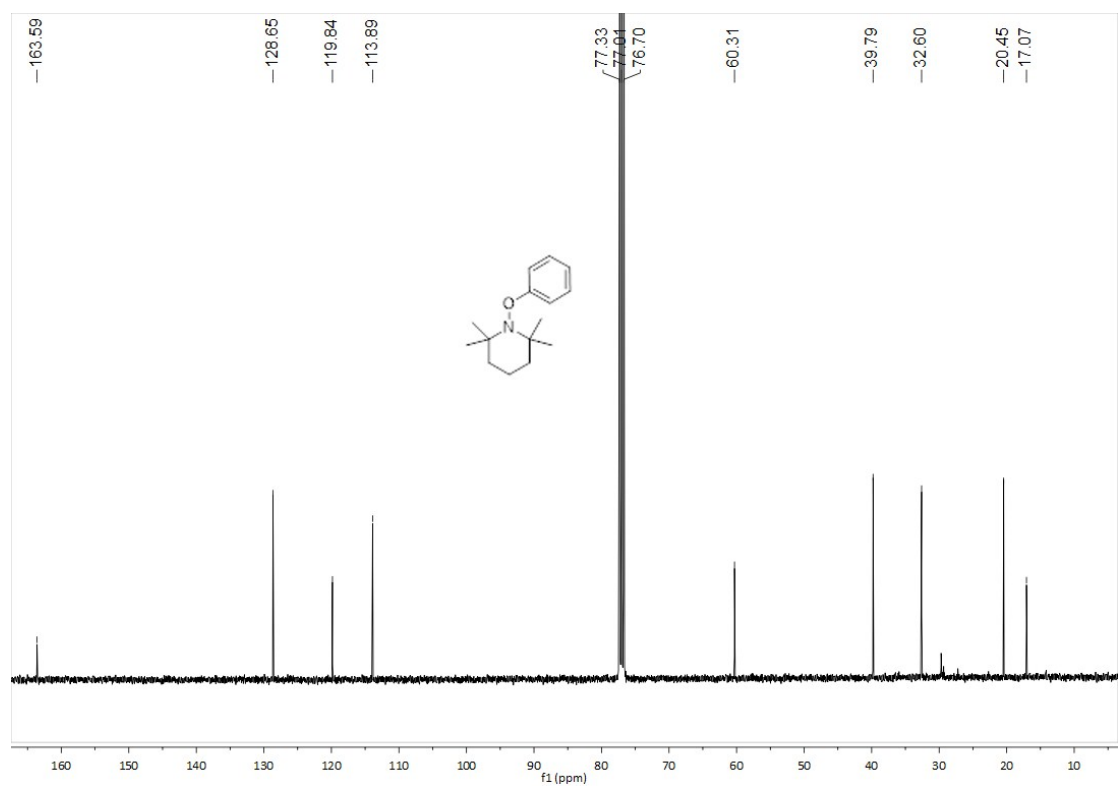

MS for **5** (calcd for C<sub>13</sub>H<sub>27</sub>N<sub>3</sub>O<sub>2</sub><sup>+</sup> [M+H]<sup>+</sup> 258, found 258)

2016-9-5 21:36:34 1 / 1

### ==== Shimadzu LabSolutions Data Report ====

#### <Spectrum>

Line# 1 R. Time: 0.000(Scan# 1)  
MassPeaks: 100  
RawMode: Single 0.000(1) BasePeak: 203(157412)  
BG Mode: None Segment 1 - Event 1

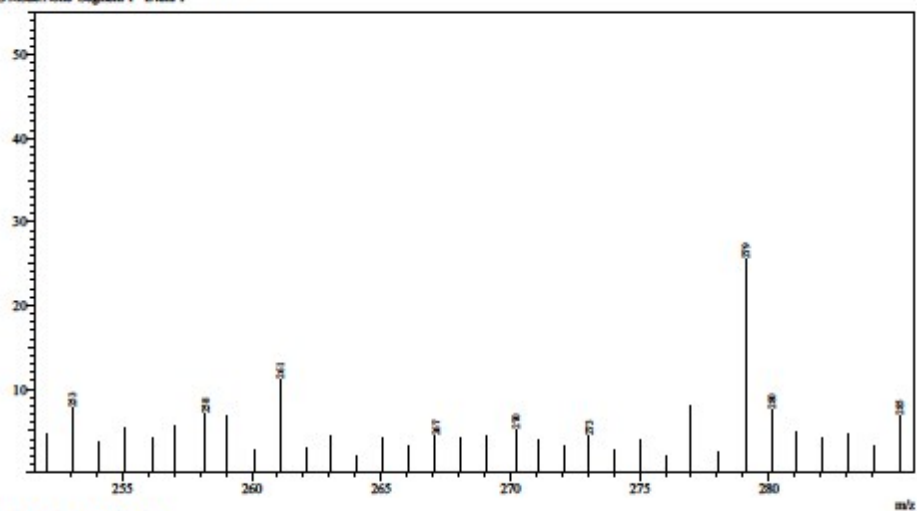

Line# 2 R. Time: 0.017(Scan# 2)  
MassPeaks: 101  
RawMode: Single 0.017(2) BasePeak: 293(10488)  
BG Mode: None Segment 1 - Event 2

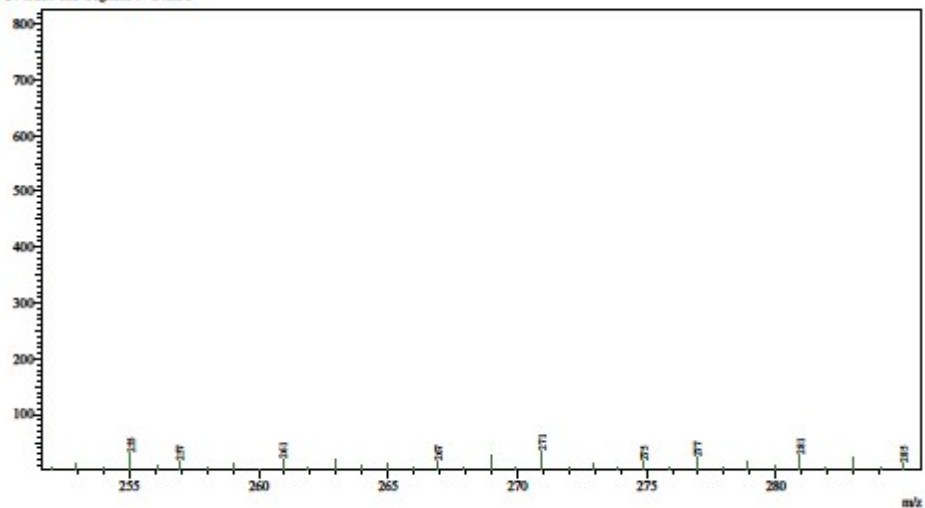

E:\LCMS-data\北ノ端端端端端端wy\wy20160905-2.lcd

MS for **6** (calcd for  $C_{15}H_{25}N_3ONa^+$   $[M+Na]^+$  286, found 286)

2016-9-5 21:31:16 1 / 1

==== Shimadzu LabSolutions Data Report ====

<Spectrum>

Line# 1 R. Time: 0.000(Scan# 1)  
Mass Peak: 50  
Raw Mode: Single 0.000(1) Base Peak: 279(33961)  
BG Mode: None Segment 1 - Event 1

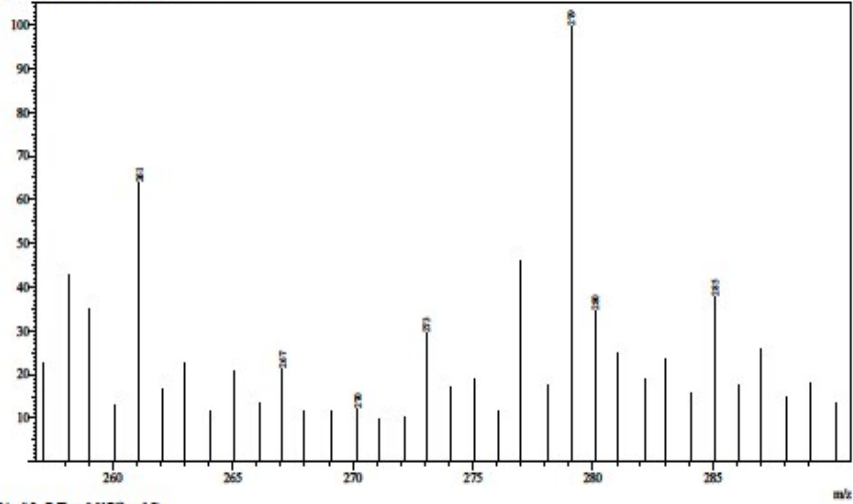

Line# 2 R. Time: 0.017(Scan# 2)  
Mass Peak: 51  
Raw Mode: Single 0.017(2) Base Peak: 293(11891)  
BG Mode: None Segment 1 - Event 2

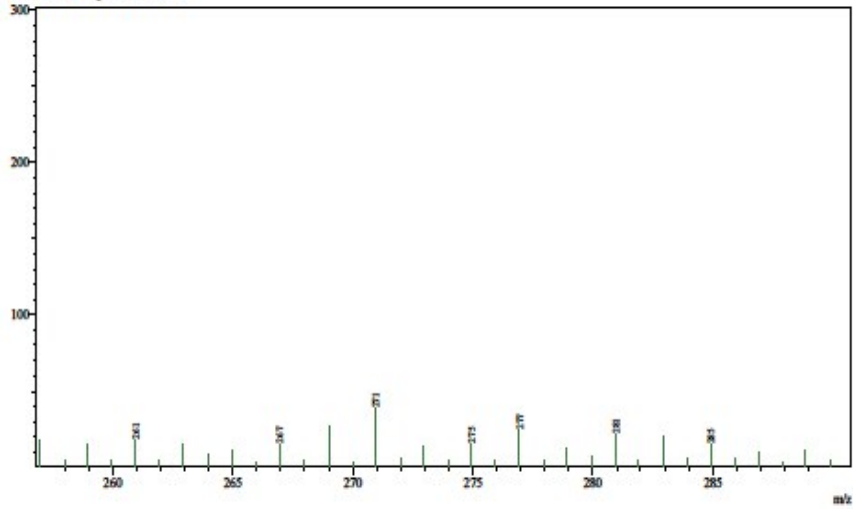

E:\LCMS-data\北ノ橋橋橋橋橋線\wy\wy20160905-5.lcd
